1 **CRISPR screening identifies novel PARP inhibitor classification based on**  
2 **distinct base excision repair pathway dependencies**

3

4 Gregory A. Breuer<sup>1,2</sup>, Jonathan Bezney<sup>1</sup>, Nathan R. Fons<sup>1,2</sup>, Ranjini K. Sundaram<sup>1</sup>, Wanjuan  
5 Feng<sup>3</sup>, Gaorav P. Gupta<sup>3</sup>, and Ranjit S. Bindra<sup>1,2,\*</sup>

6

7 <sup>1</sup> Department of Therapeutic Radiology, Yale University School of Medicine, New Haven, CT  
8 06520-8034, USA

9 <sup>2</sup> Department of Pathology, Yale University School of Medicine, New Haven, CT 06520-8034,  
10 USA

11 <sup>3</sup> Department of Radiation Oncology, University of North Carolina, Chapel Hill, 27599

12

13 \*To whom correspondence should be addressed. Email: [ranjit.bindra@yale.edu](mailto:ranjit.bindra@yale.edu)

14

15

16

17

18

19

20

21 **ABSTRACT**

22 DNA repair deficiencies have become an increasingly promising target for novel therapeutics  
23 within the realm of clinical oncology. Recently, several inhibitors of Poly(ADP-ribose)  
24 Polymerases (PARPs) have received approval for the treatment of cancers primarily with  
25 deleterious mutations in the homologous recombination (HR) proteins, BRCA1 and BRCA2.  
26 Despite numerous clinical trials which have been completed or are currently ongoing, the  
27 mechanism of action by which PARP inhibitors selectively kill tumor cells is poorly  
28 understood. While many believe “trapping” of PARP proteins to DNA at sites of damage is  
29 the most important determinant driving cytotoxicity by these drugs, clinically effective  
30 inhibitors exist with a diverse range of PARP-trapping qualities. These findings suggest that  
31 characterization of inhibitors as strong versus weak trappers does not properly capture the  
32 intra-class characteristics of these drugs. Here, we use a novel, targeted DNA damage  
33 response (DDR) CRISPR/Cas9 screening library to reveal heterogenous genetic dependencies  
34 on the base excision repair (BER) pathway for PARP inhibitors, which is not correlated with  
35 PARP trapping ability or catalytic inhibition of PARP. These findings demonstrate that  
36 inhibition of PARylation and induction of PARP trapping are not the only factors contributing  
37 to distinct biological activity for different PARP inhibitors, and they provide insight into the  
38 optimal choice of PARP inhibitors for use in the setting of specific DDR defects.

39

40 **AUTHOR SUMMARY**

41 Targeted cancer therapies rely on our general understanding of which genetic mutations are  
42 involved in both sensitivity and resistance to such anticancer agents. In this study, we  
43 describe the use of functional genetic screening to evaluate the role of various DNA repair  
44 proteins in response to inhibitors of PARP, a quintessential example of targeted therapy.

45 While PARP inhibitors are best known for their utility in cancers with homologous  
46 recombination defects, we show that some inhibitors within this class may have additional  
47 functionality in cancers with deficient base excision repair. These findings highlight not only  
48 the importance of PARP inhibitor selection in the appropriate context, but also the  
49 mechanistic differences that exist within this class of inhibitors. It is our hope that our  
50 findings will inspire future work evaluating the use of specific PARP inhibitor selection in  
51 designing clinical trials to further expand the use of PARP inhibitors beyond tumors with  
52 homologous recombination deficiencies.

53

## 54 **INTRODUCTION**

55 Over the last decade, inhibitors of poly(ADP-ribose) polymerase-1 and -2 (PARP1/2) have  
56 been established as safe and effective cancer therapeutics, which are most active against  
57 tumors with homologous recombination (HR) defects, such as those with deleterious  
58 mutations in BRCA1, BRCA2, and others [1-3]. The PARP family of proteins utilize NAD<sup>+</sup> to  
59 add one (mono-) or more (poly-) ADP-ribose chains to target proteins in response to various  
60 stimuli (referred to as PARylation) [4]. While most proteins downstream from PARP1 and  
61 PARP2 act in DNA damage response (DDR) pathways, over 170 different PARP interactions  
62 have been described, and thus these proteins play important roles in a diverse range of  
63 functions, ranging from cell cycle regulation to cell motility [5, 6]. Furthermore, the targets  
64 of such PARylation events are known to be stimulus-dependent [7]. PARP proteins play a  
65 well-established role in single strand break (SSB) repair, in which they recruit proteins such  
66 as XRCC1 and other factors for resolution of these lesions [8]. Prevention of SSB repair can  
67 result in increased replication stress, unrepaired double-strand breaks (DSBs), and difficulty  
68 with replication restart, which collectively are thought to underlie the enhanced cytotoxicity

69 of PARP inhibitors in HR-defective cancers [9-11]. However, recent evidence suggests that  
70 the effect of “trapping” PARP1 at sites of SSB repair may be more important for cytotoxicity  
71 of these agents, particularly in HR-defective cells [12, 13]. Trapping has been exhibited for  
72 both PARP1 and PARP2, though PARP1 remains the most important family member  
73 regarding SSB repair and the induction of synthetic lethality [8]. Despite these new insights,  
74 clinically relevant PARP inhibitors exist across a wide spectrum of potencies and specificities,  
75 in relation to PARP trapping ability, catalytic inhibition of PARylation, and efficacy in  
76 targeting other members of the PARP family of proteins [14]. Additionally, loss of PARP  
77 function in the setting of HR deficiencies shows moderate growth inhibition, independent of  
78 trapping inhibitors, indicating that both actions may be important for cell toxicity [15].

79

80 More recent studies suggest that synthetic lethal interactions with PARP inhibitors extend  
81 beyond BRCA1 and BRCA2 mutations, to including additional DDR proteins, such as  
82 mutations in the RAD51 paralogues, PALB2, ATM, and others [16]. Furthermore, PARP  
83 inhibitor sensitivity has been used as a screening tool to identify novel HR-related functions  
84 of genes, such as mutant IDH1 and ribonuclease H2 [17, 18]. As *in vitro* studies continue to  
85 show an ever-expanding landscape of possible uses for PARP inhibitors, it is not fully  
86 understood whether these sensitivities extend across the entire class of PARP inhibitors, or  
87 only a subset of drugs within this class.

88

89 With the knowledge that PARP trapping ability is functionally independent of catalytic  
90 inhibition, we set out to characterize the utility of the clinically available inhibitors --  
91 olaparib, rucaparib, talazoparib, niraparib, and veliparib. Using a high coverage, targeted  
92 DDR CRISPR/Cas9-based screening library, we have developed a novel assay focused solely

93 on known DDR modulators for greater sensitivity and reproducibility. In addition, we have  
94 characterized the most clinically relevant PARP inhibitors based on inhibition of PARylation  
95 and PARP1 trapping ability, in order to look for patterns of induced sensitivity to PARP  
96 inhibition in the presence of key DDR defects. We report here that clinically relevant PARP  
97 inhibitors can be functionally clustered into two unique classes, based on activity in the  
98 presence of base excision repair (BER) defects, and not on PARP1 trapping ability as was  
99 previously suggested. These results show that effectors of response to PARP inhibitors  
100 extend beyond the scope of HR perturbation and PARP trapping, and suggests that a better  
101 understanding of secondary targets may be critical for the optimal application of the  
102 numerous PARP inhibitors which are now being used in the clinic.

103

## 104 **RESULTS**

### 105 **Clinically-relevant PARP inhibitors have varying degrees of specificity for PARP1 trapping** 106 **and inhibition of PARylation**

107 PARP inhibitors have traditionally been evaluated via qualitative or quantitative  
108 immunoassays measuring downstream PARylation in the setting of induced DNA damage.  
109 We adapted this format to 96-well microplates to better accommodate high-throughput  
110 quantification, and to more accurately parallel the methods used in short-term viability  
111 assays using the same compounds (**Fig 2A**). We tested a diverse and structurally unique  
112 collection of PARP inhibitors in these studies (**Fig 1**). As expected, all PARP inhibitors showed  
113 dose-dependent inhibition of PARylation in the setting of alkylation damage, with a nearly  
114 1000-fold difference between the most potent inhibitor of PARylation, talazoparib, and the  
115 weakest tested, A-966492 (**Fig 2B**).

116

117 We then tested the same panel of inhibitors in a fluorescence polarization-based assay,  
118 which measures binding of PARP1 to a fluorescently-labeled DNA substrate in the presence  
119 and absence of PARP inhibition [12]. As expected, measured polarization of wells containing  
120 compounds reported to have strong PARP-trapping characteristics showed increased  
121 potency when compared to compounds such as veliparib, which have been reported to have  
122 limited trapping potency (**Figs S1A-B**). Similar to results from measured inhibition of  
123 PARylation, talazoparib was again found to be the most potent compound tested in the  
124 fluorescence polarization assay, with a measured IC<sub>50</sub> approximately 10-fold lower than the  
125 next most potent compound (**Fig 2C**). Additional results were found to correlate well with  
126 previously published data [12, 19]. Notably, potency of PARP inhibitors as measured by  
127 PARylation immunoassay was not found to be significantly correlated with trapping potency  
128 as measured by PARP1 trapping assay ( $R^2 = 0.1058$ ,  $p > 0.05$ , Spearman  $r = 0.3$ ), indicating  
129 that these two processes occur independent of one another (**Fig 2D**).

130

131 **Both PARP1 trapping potency and inhibition of PARylation fail to independently predict**  
132 **synthetic lethality in HR-deficient cells**

133 As noted earlier, synthetic lethal interactions between PARP1 inhibition and HR-deficiencies  
134 are hypothesized to be markedly enhanced by trapping of PARP1 at sites of DNA damage  
135 [20]. In order to quantify growth inhibition across all tested PARP inhibitors, we performed  
136 short-term viability assays in isogenic HR-proficient and -deficient colorectal  
137 adenocarcinoma cell lines, DLD-1 and DLD-1 BRCA2<sup>-/-</sup>, respectively. Growth inhibition in  
138 both cell lines across the spectrum of PARP inhibitors was found to vary widely relative to  
139 the IC<sub>50</sub>s for PARylation and PARP1 trapping (**Fig 3A,B**). Growth inhibition in the HR-  
140 proficient DLD-1 cell line was found to be significantly correlated with both inhibition of

141 PARylation ( $p = 0.006$ ) and trapping potency ( $p < 0.0001$ ) (**Fig 3A**). However, growth  
142 inhibition in HR-deficient DLD-1 BRCA2<sup>-/-</sup> cells was not found to correlate with inhibition of  
143 PARylation ( $p = 0.345$ ) and only trended towards a significant correlation with trapping  
144 potency ( $p = 0.068$ ) (**Fig 3B**). Interestingly, specific growth inhibition in HR-deficient cells  
145 relative to wild-type counterparts did not correlate with either inhibition of PARylation ( $p =$   
146  $0.4384$ ) or PARP1 trapping ( $p = 0.7213$ ) (**Fig 3C**). Overall, these findings suggest that neither  
147 the inhibition of PARylation, nor the PARP trapping ability of PARP inhibitors independently  
148 predicts the magnitude of synthetic lethality of PARP inhibitors in HR-deficient cell lines.

149

#### 150 **Targeted CRISPR/Cas9 screen reveals a novel classification of PARP inhibitors**

151 Numerous prior studies have elucidated synthetic lethal interactions between PARP  
152 inhibition and specific DNA repair deficiencies (reviewed in [21]), while few have focused on  
153 possible differences between multiple structurally unique PARP inhibitors and DDR genes.  
154 We thus performed a targeted CRISPR/Cas9-based lentiviral screen using five structurally  
155 unique inhibitors from **Fig 1**, which were selected to represent the broad range of PARP  
156 trapping and PARylation activities that we observed in our earlier studies (see **Figs 4A,B**).

157

158 To evaluate the validity and sensitivity of our assay, analysis of all tested PARP inhibitors  
159 were combined in comparison to DMSO-treated control group, with the expectation that  
160 key proteins involved in homologous recombination would be among the most sensitizing  
161 findings. Among the top single-gene knockouts conferring sensitivity to all tested PARP  
162 inhibitors were RAD51, XRCC3, BRCA1, RNF8, ATM, ATR, and others (**Fig 4C**). Knockout of  
163 PARP1 was also shown to confer a general resistance to PARP inhibition as expected, though  
164 the size of this effect varied depending on the specific inhibitor in question. Individual PARP

165 inhibitors were generally well-correlated with the average response to PARP inhibitors, with  
166 talazoparib being most similar to the average ( $R^2 = 0.7307$ ) and veliparib and rucaparib ( $R^2 =$   
167  $0.61, 0.614$ ) being least correlated to the average response (**Fig S2**).

168

169 In order to look for trends in response to single-gene knockouts across multiple inhibitors,  
170 dimensionality reduction was performed, using response to each gene as input. Using these  
171 techniques, compounds showing similar responses across our targeted library should cluster  
172 closer together. Principal components analysis of inhibitors based on response to single-  
173 gene knockouts revealed two groupings of clinical PARP inhibitors, with Group A consisting  
174 of talazoparib, olaparib, and niraparib and Group B consisting of veliparib and rucaparib (**Fig**  
175 **4D**). These data suggest a novel division of clinically relevant PARP inhibitors based entirely  
176 on functional classification in response to deficiencies in DNA repair, and does not appear to  
177 correlate with measured inhibition of PARylation or PARP1 trapping potency (**Fig 3A-C**).

178

179 **Group-specific targets reveal response to XRCC1, LIG3, and PARP1 knockout as key**  
180 **predictors of overall potency of PARP inhibitors**

181 To better evaluate the defining characteristics between Group A and Group B inhibitors, we  
182 used publicly available gene ontology data to look for differences in effect of key DDR  
183 pathways. Although HR and Fanconi Anemia pathways showed the strongest sensitizing  
184 phenotype to both Group A and Group B inhibitors, differences between the two groups  
185 were best exemplified by differences in sensitization to key proteins in both base excision  
186 repair (BER) and mismatch repair (MMR) pathways (**Fig 5A**). Within BER, increased  
187 resistance to PARPi in the presence of PARP1 knockout and increased sensitivity to PARPis  
188 upon loss of LIG3 and XRCC1 were the most defining characteristics of Group A inhibitors



189 relative to others (**Fig 5B**). Increased sensitivity to POLE4 was also noted among Group A  
190 inhibitors followed by differential sensitivities to FEN1, LIG1, and PARP3 approaching  
191 significance (**Fig 5B**).

192

193 Findings from the initial screen were confirmed first by testing selected sgRNAs from the  
194 original library by 96h short-term viability assay and then by pooled siRNA experiments to  
195 measure the effect of knockdown, rather than knockout, of each gene in the presence of  
196 PARPi. Short-term viability assays were also performed using U2-OS cells to show effects  
197 carry across unrelated cell lines, independent of tissue of origin. Both individual sgRNA  
198 experiments, as well as siRNA experiments, largely recapitulated the results seen by pooled  
199 CRISPR/Cas9 screening (**Figs 6A-C, Fig S3**). XRCC1 and LIG3 knockouts and knockdowns show  
200 increased sensitivity to Group A inhibitors that are far less pronounced or absent in Group B  
201 across all assays. These findings confirm the results from our targeted CRISPR/Cas9 screen,  
202 showing that loss of function of XRCC1 and LIG3 confer increased sensitivity to some, but  
203 not all PARP inhibitors. Interestingly, sensitization to PARP inhibition has been shown  
204 previously in the setting of XRCC1 deficiency, however this study was limited only to the  
205 Group A inhibitors, talazoparib and olaparib [22]. Additionally, the degree of sensitization in  
206 the setting of loss of either XRCC1 and LIG3 appears to correlate with the overall PARP1-  
207 dependence of toxicity, and may provide critical insight into better understanding the  
208 therapeutic effects of PARP inhibition in the setting of such deficiencies.

209

210 **In silico analysis reveals similar clustering of tested PARP inhibitors and association with**  
211 **PARP1/XRCC1/LIG3 loss-of-function**

212 To assess our functional genetic screening methods in comparison to alternative datasets,  
213 we examined publicly available datasets from the DepMap project comparing gene  
214 essentiality and drug sensitivity across hundreds of human cell lines. Interestingly, principal  
215 components analysis of the relative sensitivities of each of the five examined PARP  
216 inhibitors tested across over 400 cell lines reveals clusters coinciding with those found via  
217 our functional genetic screen, with higher degrees of correlation between talazoparib,  
218 niraparib, and olaparib than with rucaparib and veliparib (**Fig 7A**). We next performed  
219 hierarchical clustering to identify groupings of cell lines with similar sensitivity patterns to  
220 the tested inhibitors to examine qualities relating to selective sensitivity in talazoparib,  
221 niraparib, and olaparib (**Fig 7B**). Notably, cell lines with relative sensitivity to PARP inhibition  
222 were split between two groups - the pan-sensitive group identified as Cluster 1 and the  
223 selectively sensitive group identified as Cluster 3. Cell lines within Cluster 3 are defined by  
224 moderate to high sensitivity to talazoparib, niraparib, and olaparib and mid to low sensitivity  
225 to rucaparib and veliparib (**Fig 7C**).

226

227 We next performed an analysis of gene essentiality within each cluster to measure what  
228 factors correlate with pan-sensitivity rather than selective sensitivity. Analysis of relative  
229 sensitivity to loss of selected genes identified within our functional screen as well as genes  
230 having a significant cluster-dependent effect via ANOVA analysis (**Fig 7D**). Cell lines  
231 exhibiting pan-sensitivity to PARP inhibition in Cluster 1 are more sensitive to loss of FEN1,  
232 LIG1, PARP1, and PARP2, but not LIG3 or XRCC1 in comparison to cell lines showing selective  
233 sensitivity in Cluster 3. Such differences between pan-sensitive and selectively sensitive cell  
234 lines may provide insight into the differing mechanism resulting in cytotoxicity in the  
235 presence of PARP inhibition.

236

237 **DISCUSSION**

238 While the exact mechanistic basis for synthetic lethal interactions with PARP inhibition in  
239 the setting of BRCA1/2 mutations and HR deficiencies remains controversial, our data  
240 clearly demonstrate that neither trapping potency nor strength of inhibition of PARylation  
241 fully explain the response to such inhibitors. These findings are in agreement with recent  
242 biochemical studies suggesting that inhibitors of PARP1 fit into three major classifications  
243 based on allosteric effects of PARPi binding as well as retention at sites of DNA damage [23].  
244 Similarly, our unbiased analysis of over 280 genes known to be involved in DNA damage  
245 repair and response found unique groupings of PARP inhibitors which do not correlate solely  
246 with either the ability to inhibit downstream PARylation by PARP1 or the trapping of PARP1  
247 to sites of damage based on widely-used biochemical assays. Across the PARP inhibitors  
248 tested in our analysis, we do not observe any correlation between synthetic lethality in the  
249 context of HR defects and strength of PARP1 trapping or inhibition of PARylation. Indeed,  
250 PARP trapping has been associated with increased toxicity in both normal tissue as well as  
251 within tumors, likely resulting in side effects seen in clinical trials such as complete bone  
252 marrow failure and other cytopenias [24]. Such findings make appropriate classification of  
253 inhibitors for use in patient populations ever more relevant, as the use of PARP inhibitors in  
254 clinic becomes increasingly common.

255

256 Within our screen, we see strong sensitization to all PARP inhibitors through knockout of  
257 key components of HR (RAD51, BRCA1, BRCA2, etc.), however only three of our tested  
258 inhibitors respond to loss of function of proteins immediately downstream of PARP1 in BER.  
259 Interestingly, loss of XRCC1 and LIG3 was found to be most toxic to cells concurrently

260 treated with inhibitors that are dependent on PARP1 for sensitization (Group A PARP  
261 inhibitors). We hypothesize that this observation may be due to one or more of the  
262 following mechanisms. i) PARP1-independent inhibitors may be maximally disrupting  
263 downstream BER through disruption of PARP1 signaling at lethal doses, so further loss of  
264 function does not alter response to inhibition. ii) Loss of XRCC1 and LIG3 results in  
265 hyperactivation of PARP1 as has been shown previously, and is therefore increasing  
266 opportunities for PARP1-dependent toxicity [25]. iii) Loss of XRCC1 and LIG3 results in  
267 unrepaired lesions of the DNA, which may be preferentially targeted by PARP1-dependent  
268 inhibitors. Differential sensitivity to loss of function of PARP1, PARP2, LIG1, and FEN1 as  
269 seen in our DepMap essentiality analysis indicates that all PARP inhibitors may be equally  
270 effective in targeting cells dependent on BER function, however talazoparib, niraparib, and  
271 olaparib may have extended functionality outside of this scope. Additional work is necessary  
272 to tease apart such mechanisms and further evaluate the utility of various classes of PARP  
273 inhibitors in specific clinical settings.

274

275 Although there are over 250 active clinical trials testing PARP inhibitors in cancer at the time  
276 of this writing, there is little information regarding appropriate selection of PARP inhibitor  
277 therapy and utilization of PARP inhibitors in patients who have failed to respond to one or  
278 more of such inhibitors. Likewise, no head-to-head clinical trials comparing PARP inhibitors  
279 have been completed to date, making selection of PARP inhibitor treatment in the clinical  
280 setting difficult. Neither PARP trapping nor catalytic inhibition of PARylation appear to  
281 explain the efficacy of PARP inhibition in the treatment of cancers with DNA repair  
282 deficiencies. Our results indicate that the efficacy of PARP inhibitors may hinge on some  
283 combination of PARP trapping and inhibition of downstream targeting of PARP1, with a

284 handful of inhibitors, talazoparib > niraparib > olaparib, being far more dependent on the  
285 presence of PARP1 than others. Clinical trials are necessary to determine the utility of  
286 PARP1-independent inhibitors in the setting of limited PARP1 expression. Additionally,  
287 patients with mutations in XRCC1 and LIG3 may benefit from treatment with talazoparib,  
288 olaparib, or niraparib over treatment with PARP1-independent inhibitors. Further studies  
289 are necessary to determine how these results may affect response to treatment in patients,  
290 and whether our findings may translate into a clinical setting. Overall, our results highlight  
291 an exciting technique in functional analysis of PARP inhibition via CRISPR/Cas9 screening to  
292 define genetic dependencies, and show the importance of functional BER in the setting of  
293 select PARP inhibitors.

294

## 295 **MATERIALS AND METHODS**

### 296 ***Cell lines and reagents***

297 Colorectal adenocarcinoma cell lines DLD-1 and DLD-1 BRCA2 <sup>-/-</sup> were used and maintained  
298 in RPMI medium with 10% fetal bovine serum (FBS; Gibco) at 37°C with 5% CO<sub>2</sub>. The DLD-1  
299 BRCA2<sup>-/-</sup> cell line has an engineered exonic deletion as described [26]. HEK293FT  
300 (ThermoFisher) are human embryonal kidney cells maintained in Dulbecco's Modified  
301 Eagle's Medium, high glucose (DMEM; Thermo Scientific/Gibco) supplemented with 10%  
302 FBS. MCF10A cells are normal human mammary cells and were maintained in DMEM/F12  
303 media (Gibco, #11330032) supplemented with 5% horse serum, 10 ng/ml epidermal growth  
304 factor, 0.5 mg/ml hydrocortisone, 100 ng/ml cholera toxin, and 10 ug/ml insulin. PARP  
305 inhibitors tested for the purposes of this study were obtained from the following vendors:  
306 Talazoparib (Selleckchem; #S7048), olaparib (Selleckchem; #S1060), rucaparib  
307 (Selleckchem; #S1098), niraparib (Selleckchem; #S2741), veliparib (Selleckchem; #S1004), A-

308 966492 (Selleckchem; #S2197), KU-0058948 (Axon Medchem; #2001), NMS-P118  
309 (Selleckchem; #S8363), E-7449 (Selleckchem; #S8419), AG-014699 (Axon Medchem; #1529),  
310 BGB-290 (BeiGene).

311

312 ***PARylation Immunoblot***

313 To measure PARylation inhibition, MCF10A cells were plated on 96-well microplates  
314 (Greiner) at a density of 20k cells/well 24h prior to treatment with methyl-  
315 methanesulfonate (MMS; Sigma) and indicated PARP inhibitors. After 24h in culture, media  
316 from the plates was aspirated and a fresh 75  $\mu$ l of pre-warmed media was added to each  
317 well. To this, 25  $\mu$ l of media containing either 0.01% MMS, PARP inhibitors, or a combination  
318 of the two were added to each well. Cells were incubated for 30m in normal culture  
319 conditions. Following the 30m culture, media was aspirated and cells were rinsed once with  
320 PBS. Cell cultures were lysed with RIPA lysis buffer for 30m at 4°C with occasional agitation.  
321 Lysates were spotted on nitrocellulose membrane (BioRad) and allowed to dry at room  
322 temperature for 1h. Blocking was performed in TBS-T with 5% BSA (Gold Biotechnology) for  
323 1h at room temperature, followed by overnight incubation with anti-PAR antibody  
324 (Trevigen, #4336-BPC-100) at 4°C. After primary incubation, three 10-minute washes with  
325 TBS-T were performed, followed by 1h incubation with HRP anti-rabbit conjugated  
326 secondary antibody (ThermoFisher; #31462) at room temperature under constant agitation.  
327 Images obtained on ChemiDoc (BioRad) following addition of Clarity Western ECL substrate  
328 (BioRad). Image quantification was done using ImageJ imaging software and normalized to  
329 no-MMS and no-PARPi control [27]. Curve fitting and data analysis performed using  
330 Graphpad Prism (Graphpad Software).

331

332 ***PARP1 Trapping Assay***

333 Preparation of PARP1 dsDNA substrate was performed as previously described [28]. Briefly,  
334 single-stranded oligonucleotides were hybridized by combining in equimolar ratio of the  
335 following sequences:

336 5'-AlexaFluor488-ACCCTGCTGTGGGCdUGGAGAACAAGGTGAT

337 ATCACCTTGTCTCCAGCCCACAGCAGGGT

338

339 This mixture was then heated to 95 °C for 5m and slowly cooled to room temperature at 5  
340 °C/min. Hybridized oligonucleotide was then incubated with APE1 and UDG (NEB) at 37°C  
341 for 1h to create a single strand break recognized by the PARP1 enzyme.

342 To measure inhibition of release of DNA substrate from PARP1 enzyme, 30 nM GST-Tagged  
343 PARP1 protein (BPS Biosciences) was incubated with 1 nM DNA substrate and varying  
344 amounts of PARPi or DMSO for 1h in reaction buffer containing 50 mM Tris (pH 8.0), 4 mM  
345 MgCl<sub>2</sub>, 10 mM NaCl, and 50 ng/ml BSA in water at RT. After 1 hour, fluorescence  
346 polarization readings were recorded using a Cytation 3 (Biotek) multi-mode imager with  
347 fluorescence polarization filter prior to adding 1mM NAD<sup>+</sup> and every 5 minutes after. Curve-  
348 fitting and statistical analysis was performed using Graphpad Prism (Graphpad Software).

349 The concentration of PARP1 to fluorescent dsDNA substrate was first titrated to optimize  
350 detection of polarization via automated plate reader in 96-well half volume microplates (**Fig**  
351 **S1**). To measure trapping efficiency of various PARP inhibitors, purified PARP1 protein, DNA  
352 substrate, and varying concentrations of PARP inhibitors were incubated for 1h at room  
353 temperature to ensure saturated binding capacity. After the incubation, NAD<sup>+</sup> was added to  
354 the reaction to initiate release of DNA from PARP1, and polarization measurements were

355 recorded in 5-minute intervals for 120 minutes. Importantly, controls lacking NAD<sup>+</sup>, PARP1  
356 protein, and DNA substrate were included for normalization.

357

### 358 ***CRISPR/Cas9 Screening and Analysis***

359 A CRISPR/Cas9 DDR targeted library was assembled using available gene ontology databases  
360 and lists of genes involved in DNA damage repair and response. The top 10 suggested  
361 sgRNAs targeting each gene were selected from the <http://www.genome-engineering.org/>  
362 website and supplemented with non-targeting control sgRNAs [29]. These oligos were  
363 assembled into the LentiCRISPRv2 lentivirus backbone as described in the original protocols  
364 [30, 31]. Viral production was carried out in HEK293FT cells by equimolar co-transfection of  
365 LentiCRISPRv2 library, psPAX2, and pCMV-VSV-G using Lipofectamine 2000 (Invitrogen;  
366 #11668027). lentiCRISPR v2 was a gift from Feng Zhang (Addgene plasmid # 52961), psPAX2  
367 was a gift from Didier Trono (Addgene plasmid # 12260), and pCMV-VSV-G was a gift from  
368 Bob Weinberg (Addgene plasmid # 8454) [32]. Viral titer was assessed upon collection and  
369 concentration of lentiviral supernatant with Lenti-X Concentrator (Takara Biotech; #631231).  
370 Appropriate final concentrations were chosen to maintain MOI < 0.3 to reduce probability of  
371 coinfection with two or more sgRNA sequences. For screening, DLD-1 cells were transduced  
372 in 8 µg/ml Polybrene (Sigma-Aldrich) with the multiplexed CRISPR/Cas9 library containing 10  
373 unique sgRNAs targeting 284 different genes involved or implicated in DDR-associated  
374 pathways along with one thousand non-targeting sgRNA controls. Cells were then selected  
375 with Puromycin (InvivoGen; #ant-pr-1) for 3 days following transduction, ensuring a MOI <  
376 0.3 to prevent multiple sgRNA integrations per cell. After initial selection, cells were split  
377 into six treatment groups and treated with appropriate PARPi at calculated GI<sub>30</sub> or DMSO as  
378 indicated to assess effects on both sensitivity and resistance to tested inhibitors. Samples



379 were taken at Day 0 as well as every 2 days to ensure logarithmic growth while maintaining  
380 a high sample size.

381

382 Preparation and sequencing of samples was conducted using dual-indexed paired-end  
383 sequencing on MiSeq System (Illumina) using a 2x150 protocol. Library preparation was  
384 conducted two independent primer sets. Primers used in the first reaction amplify the  
385 targeted sgRNA region of the integrated vector and primers used in the second reaction  
386 allow for indexing and multiplexing during sequencing. Additional spacer sequences of 0-2  
387 bases were inserted between the adapter and sequence-specific portions of the sequencing  
388 primers to increase library diversity during sequencing.

389 Analysis was performed using a rank scoring algorithm similar to one previously described  
390 [33]. sgRNAs were extracted from sequencing reads, counted, and normalized to total  
391 sample size and non-targeting control abundance. A rank score was calculated for each gene  
392 represented in the targeted library by comparing the abundance of each sgRNA to its  
393 representation in the targeting library sample. Each screen was done in duplicate and  
394 samples were prepared from multiple time points in each treatment group to reduce  
395 sampling error.

396

### 397 ***Short-Term Viability Assays***

398 Short-term viability assays validating individual sgRNA results were performed by first  
399 transducing cells in 6-well plates with lentivirus, selecting with Puromycin for 48h, then  
400 plating into 96-well plates for 24h prior to adding appropriate concentrations of PARPi. 96h  
401 after the initiation of treatment, media was aspirated, cells were washed once with PBS and  
402 were then fixed using 4% formaldehyde (Sigma-Aldrich) in PBS solution for 15m at room

403 temperature. Cells were then stained with Hoechst 33342 (Sigma-Aldrich; #B2261) for 45  
404 minutes prior to imaging using the Cytation 3 multi-mode imager as described previously  
405 [34]. Cell counting was performed using a pipeline created in CellProfiler image analysis  
406 software which stitches images by well and identifies the number of cell nuclei per well by  
407 fluorescence staining [35]. Graphing and data analysis was performed using Graphpad Prism  
408 (Graphpad Software). Assays utilizing pooled siRNA (Horizon; ON TARGETplus siRNA) were  
409 conducted by first transfecting with RNAiMAX (Invitrogen; #13778100) 72h prior to  
410 exposure to individual PARP inhibitors to ensure maximum knockdown at initial treatment.

411

#### 412 ***In Silico Analysis of Drug Sensitivities and Gene Essentiality***

413 Gene essentiality data, drug sensitivity data, and accompanying cell line information was  
414 obtained via the DepMap Data Portal (<https://depmap.org/portal/download/>) with  
415 preprocessing steps as described in accompanying manuscripts [36-39]. Additional data  
416 processing, dimensionality reduction, and plotting was done via Scikit-Learn [40].

417

#### 418 **ACKNOWLEDGEMENT**

419 This work was supported in part by the US National Institutes of Health (NIH) grant  
420 R01CA215453.

421

#### 422 **REFERENCES**

423

- 424 1. Farmer H, McCabe N, Lord CJ, Tutt AN, Johnson DA, Richardson TB, et al. Targeting the DNA  
425 repair defect in BRCA mutant cells as a therapeutic strategy. *Nature*. 2005;434(7035):917-21.
- 426 2. Ashworth A. A Synthetic Lethal Therapeutic Approach: Poly(ADP) Ribose Polymerase  
427 Inhibitors for the Treatment of Cancers Deficient in DNA Double-Strand Break Repair. *Journal*  
428 *of Clinical Oncology*. 2008;26(22):3785-90.
- 429 3. Lord CJ, Ashworth A. PARP inhibitors: Synthetic lethality in the clinic. *Science*.  
430 2017;355(6330):1152-8.
- 431 4. Malanga M, Althaus FR. The role of poly(ADP-ribose) in the DNA damage signaling network.  
432 *Biochem Cell Biol*. 2005;83(3):354-64.

- 433 5. Isabelle M, Moreel X, Gagné J-P, Rouleau M, Ethier C, Gagné P, et al. Investigation of PARP-  
434 1, PARP-2, and PARG interactomes by affinity-purification mass spectrometry. *Proteome*  
435 *Science*. 2010;8:22-.
- 436 6. Vyas S, Chesarone-Cataldo M, Todorova T, Huang Y-H, Chang P. A systematic analysis of the  
437 PARP protein family identifies new functions critical for cell physiology. *Nature Communications*.  
438 2013;4:2240.
- 439 7. Jungmichel S, Rosenthal F, Altmeyer M, Lukas J, Hottiger Michael O, Nielsen Michael L.  
440 Proteome-wide Identification of Poly(ADP-Ribosyl)ation Targets in Different Genotoxic Stress  
441 Responses. *Molecular cell*. 2013;52(2):272-85.
- 442 8. Fisher AEO, Hochegger H, Takeda S, Caldecott KW. Poly(ADP-Ribose) Polymerase 1  
443 Accelerates Single-Strand Break Repair in Concert with Poly(ADP-Ribose) Glycohydrolase.  
444 *Molecular and Cellular Biology*. 2007;27(15):5597-605.
- 445 9. Kuzminov A. Single-strand interruptions in replicating chromosomes cause double-strand  
446 breaks. *Proceedings of the National Academy of Sciences of the United States of America*.  
447 2001;98(15):8241-6.
- 448 10. Colicchia V, Petroni M, Guarguaglini G, Sardina F, Sahun-Roncero M, Carbonari M, et al. PARP  
449 inhibitors enhance replication stress and cause mitotic catastrophe in MYCN-dependent  
450 neuroblastoma. *Oncogene*. 2017;36(33):4682-91.
- 451 11. Ronson GE, Piberger AL, Higgs MR, Olsen AL, Stewart GS, McHugh PJ, et al. PARP1 and  
452 PARP2 stabilise replication forks at base excision repair intermediates through Fbh1-  
453 dependent Rad51 regulation. *Nature Communications*. 2018;9(1):746.
- 454 12. Murai J, Huang SY, Das BB, Renaud A, Zhang Y, Doroshow JH, et al. Trapping of PARP1 and  
455 PARP2 by Clinical PARP Inhibitors. *Cancer research*. 2012;72(21):5588-99.
- 456 13. Pommier Y, O'Connor MJ, de Bono J. Laying a trap to kill cancer cells: PARP inhibitors and  
457 their mechanisms of action. *Sci Transl Med*. 2016;8(362):362ps17.
- 458 14. Carney B, Kossatz S, Lok BH, Schneeberger V, Gangangari KK, Pillarsetty NVK, et al. Target  
459 engagement imaging of PARP inhibitors in small-cell lung cancer. *Nature Communications*.  
460 2018;9(1):176.
- 461 15. Bryant HE, Schultz N, Thomas HD, Parker KM, Flower D, Lopez E, et al. Specific killing of  
462 BRCA2-deficient tumours with inhibitors of poly(ADP-ribose) polymerase. *Nature*.  
463 2005;434(7035):913-7.
- 464 16. Schmitt A, Knittel G, Welcker D, Yang T-P, George J, Nowak M, et al. ATM Deficiency Is  
465 Associated with Sensitivity to PARP1- and ATR Inhibitors in Lung Adenocarcinoma. *Cancer*  
466 *research*. 2017;77(11):3040-56.
- 467 17. Sulkowski PL, Corso CD, Robinson ND, Scanlon SE, Purshouse KR, Bai H, et al. 2-  
468 Hydroxyglutarate produced by neomorphic IDH mutations suppresses homologous  
469 recombination and induces PARP inhibitor sensitivity. *Science Translational Medicine*.  
470 2017;9(375).
- 471 18. Zimmermann M, Murina O, Reijns MAM, Agathangelou A, Challis R, Tarnauskaite Z, et al.  
472 CRISPR screens identify genomic ribonucleotides as a source of PARP-trapping lesions.  
473 *Nature*. 2018;559(7713):285-9.
- 474 19. Hopkins TA, Shi Y, Rodriguez LE, Solomon LR, Donawho CK, DiGiammarino EL, et al.  
475 Mechanistic Dissection of PARP1 Trapping and the Impact on *In Vivo* Tolerability  
476 and Efficacy of PARP Inhibitors. *Molecular Cancer Research*. 2015;13(11):1465-77.
- 477 20. Ström CE, Johansson F, Uhlén M, Szigyarto CA-K, Erixon K, Helleday T. Poly (ADP-ribose)  
478 polymerase (PARP) is not involved in base excision repair but PARP inhibition traps a single-  
479 strand intermediate. *Nucleic acids research*. 2011;39(8):3166-75.
- 480 21. Pilié PG, Gay CM, Byers LA, O'Connor MJ, Yap TA. PARP Inhibitors: Extending Benefit Beyond  
481 *BRCA*-Mutant Cancers. *Clinical Cancer Research*. 2019;25(13):3759-71.
- 482 22. Ali R, Alabdullah M, Alblihy A, Miligy I, Mesquita KA, Chan SYT, et al. PARP1 blockade is  
483 synthetically lethal in XRCC1 deficient sporadic epithelial ovarian cancers. *Cancer Letters*.  
484 2020;469:124-33.
- 485 23. Zandarashvili L, Langelier MF, Velagapudi UK, Hancock MA, Steffen JD, Billur R, et al.  
486 Structural basis for allosteric PARP-1 retention on DNA breaks. *Science*. 2020;368(6486).
- 487 24. Hopkins TA, Ainsworth WB, Ellis PA, Donawho CK, DiGiammarino EL, Panchal SC, et al.  
488 PARP1 Trapping by PARP Inhibitors Drives Cytotoxicity in Both Cancer Cells and Healthy Bone  
489 Marrow. *Molecular Cancer Research*. 2019;17(2):409-19.
- 490 25. Hoch NC, Hanzlikova H, Rulten SL, Tétreault M, Komulainen E, Ju L, et al. XRCC1 mutation is  
491 associated with PARP1 hyperactivation and cerebellar ataxia. *Nature*. 2017;541(7635):87-91.

- 492 26. Hucl T, Rago C, Gallmeier E, Brody JR, Gorospe M, Kern SE. A Syngeneic Variance Library  
493 for Functional Annotation of Human Variation: Application to BRCA2. *Cancer research*.  
494 2008;68(13):5023-30.
- 495 27. Rueden CT, Schindelin J, Hiner MC, DeZonia BE, Walter AE, Arena ET, et al. ImageJ2: ImageJ  
496 for the next generation of scientific image data. *BMC Bioinformatics*. 2017;18(1):529.
- 497 28. Murai J, Huang S-yN, Das BB, Renaud A, Zhang Y, Doroshow JH, et al. Trapping of PARP1  
498 and PARP2 by Clinical PARP Inhibitors. *Cancer research*. 2012;72(21):5588-99.
- 499 29. Cong L, Ran FA, Cox D, Lin S, Barretto R, Habib N, et al. Multiplex Genome Engineering Using  
500 CRISPR/Cas Systems. *Science*. 2013;339(6121):819-23.
- 501 30. Sanjana NE, Shalem O, Zhang F. Improved vectors and genome-wide libraries for CRISPR  
502 screening. *Nature methods*. 2014;11(8):783-4.
- 503 31. Shalem O, Sanjana NE, Hartenian E, Shi X, Scott DA, Mikkelsen T, et al. Genome-scale  
504 CRISPR-Cas9 knockout screening in human cells. *Science*. 2014;343(6166):84-7.
- 505 32. Stewart SA, Dykxhoorn DM, Palliser D, Mizuno H, Yu EY, An DS, et al. Lentivirus-delivered  
506 stable gene silencing by RNAi in primary cells. *RNA*. 2003;9(4):493-501.
- 507 33. Li W, Xu H, Xiao T, Cong L, I Love M, Zhang F, et al. MAGECK enables robust identification of  
508 essential genes from genome-scale CRISPR/Cas9 knockout screens2014. 554 p.
- 509 34. Fons NR, Sundaram RK, Breuer GA, Peng S, McLean RL, Kalathil AN, et al. PPM1D mutations  
510 silence NAPRT gene expression and confer NAMPT inhibitor sensitivity in glioma. *Nature*  
511 *Communications*. 2019;10(1):3790.
- 512 35. Kametsky L, Jones TR, Fraser A, Bray M-A, Logan DJ, Madden KL, et al. Improved structure,  
513 function and compatibility for CellProfiler: modular high-throughput image analysis software.  
514 *Bioinformatics*. 2011;27(8):1179-80.
- 515 36. DepMap B. DepMap 20Q4 Public. Figshare2020.
- 516 37. Dempster JM, Rossen J, Kazachkova M, Pan J, Kugener G, Root DE, et al. Extracting  
517 Biological Insights from the Project Achilles Genome-Scale CRISPR Screens in Cancer Cell  
518 Lines. *bioRxiv*. 2019:720243.
- 519 38. Meyers RM, Bryan JG, McFarland JM, Weir BA, Sizemore AE, Xu H, et al. Computational  
520 correction of copy number effect improves specificity of CRISPR-Cas9 essentiality screens in  
521 cancer cells. *Nature genetics*. 2017;49(12):1779-84.
- 522 39. Corsello SM, Nagari RT, Spangler RD, Rossen J, Kocak M, Bryan JG, et al. Discovering the  
523 anticancer potential of non-oncology drugs by systematic viability profiling. *Nature Cancer*.  
524 2020;1(2):235-48.
- 525 40. Pedregosa F, Varoquaux G, Gramfort A, Michel V, Thirion B, Grisel O, et al. Scikit-learn:  
526 Machine Learning in Python. *J Mach Learn Res*. 2011;12(null):2825–30.

527 **FIGURE CAPTIONS**

528 **Fig 1. Chemical structures of selected PARPi.** Highlighted in red is the 3-aminobenzamide -  
529 like structure which is thought to block PARP function via inhibition of NAD<sup>+</sup> binding.

530

531 **Fig 2. Biochemical characterization of PARPi shows limited correlation between inhibition**  
532 **of PARylation and PARP trapping** (A) Representative example of PARylation immunoassay  
533 in MCF10A cells in presence and absence of 0.01% MMS and increasing amounts of the  
534 PARP inhibitor olaparib. (B) Catalytic inhibition of PARylation EC<sub>50</sub> as measured by  
535 PARylation immunoassay +/- SEM. (C) PARP1 trapping EC<sub>50</sub> per agent as measured by  
536 fluorescence polarization assay +/- SEM. (D) Comparison of PARP1 trapping potency and  
537 catalytic inhibition of PARylation.

538

539 **Fig 3. Synthetic lethality in HR-deficient cells shows no correlation with inhibition of**  
540 **PARylation nor PARP trapping potency alone.** (A) Correlation between PARP1 trapping  
541 potency or inhibition of PARylation with growth inhibition in HR-proficient and -deficient  
542 DLD-1 cells. Correlation between growth inhibition in HR-proficient cells and inhibition of  
543 PARylation was significant ( $R^2 = 0.2277$ ;  $p = 0.006$ ), as was correlation with PARP1 trapping  
544 potency ( $R^2 = 0.53$ ,  $p < 0.0001$ ). (B) In DLD-1 BRCA2<sup>-/-</sup> cells, there was no observed  
545 correlation between growth inhibition and inhibition of PARylation ( $R^2 = 0.0298$ ,  $p = 0.345$ ),  
546 and correlation with PARP1 trapping only trended towards significance ( $R^2 = 0.107$ ,  $p =$   
547  $0.068$ ). (C) Synthetic lethality does not correlate with either strength of inhibition of  
548 PARylation or trapping potency.

549

550 **Fig 4. Targeted CRISPR screen reveals two unique functional groups of PARPi based on**  
551 **overall response to loss of DDR genes.** (A) Visual representation of logIC50 values for  
552 trapping potency, inhibition of PARylation, and growth inhibition in HR-proficient and -  
553 deficient DLD-1 cells. (B) Summary of results from A. (C) Rank order average of tested  
554 inhibitors over entire screening set with single-gene knockouts conferring increased  
555 sensitivity or resistance highlighted at the extremes. (D) Principal components analysis of  
556 tested inhibitors reveals two distinct groups of inhibitors with talazoparib, olaparib, and  
557 niraparib making up Group A and veliparib, rucaparib making up Group B.

558

559 **Fig 5. Inter-group variation in response to PARPi shows greatest difference in genes**  
560 **associated with BER.** (A) Comparison of group-averaged rank score by associated pathway.  
561 Higher rank scores are associated with increased sensitivity to loss of function of proteins  
562 within each reported pathway. A single gene may appear in more than one pathway. (B)  
563 Per-gene rank scoring by PARPi group reveals significant differences in PARP1, LIG3, XRCC1,  
564 and POLE4 response to inhibitors ( $p < 0.0001$ ,  $p = 0.0094$ ,  $0.0004$ , and  $0.047$  via student's t-  
565 test). Additional genes involved in base excision repair approaching significance include  
566 FEN1, LIG1, and PARP3 ( $p = 0.054$ ,  $0.062$ ,  $0.093$ ).

567

568 **Fig 6. Loss of XRCC1 and LIG3 increase sensitivity to Group A inhibitors with limited effect**  
569 **to Group B.** (A) Short-term viability assays reveal specific response to PARP1, LIG3, and  
570 XRCC1 seen from CRISPR/Cas9 screen. Strong resistance in presence of PARP1 knockout also  
571 associated with increased sensitivity in presence of XRCC1, LIG3 knockout. (B) Pooled siRNA  
572 knockdown of each of the reported genes shows similar phenotype to CRISPR/Cas9 lentiviral  
573 knockout; again showing increased sensitivity to talazoparib, olaparib, and niraparib in the

574 presence of XRCC1/LIG3 disruption. (C) Short-term viability assays in U2-OS cell line shows  
575 similar phenotype with lentiviral CRISPR/Cas9 knockout of reported genes.

576

577 **Fig 7. Gene essentiality and drug sensitivity studies from DepMap dataset confirm**

578 **functional clustering of PARPi and dependence on BER pathway.** (A) Principal components

579 analysis of DepMap sensitivities to tested PARP inhibition shows clustering similar to those

580 seen via PCA of our functional genetic screen with talazoparib, olaparib, and niraparib

581 having similar effects across cell lines in comparison to rucaparib and veliparib. (B) Principal

582 components analysis and agglomerative clustering of cell lines in response to PARP

583 inhibition reveals 4 distinct clusters. (C) Clustered sensitivity to PARP inhibition showed

584 compound-specific responses, particularly in Cluster 3, which shows equal sensitivity to the

585 pan-sensitive Cluster 1 in talazoparib, similar sensitivity to Cluster 1 in niraparib and

586 olaparib, but relative resistance in comparison to Cluster 1 in rucaparib and veliparib. (D)

587 Selection of genes showing differences in essentiality across clusters. Columns denoted by

588 arrows correspond to genes found to differentially affect response to PARP inhibition

589 between Group A and Group B inhibitors.

590

591

592

593

594

595

596

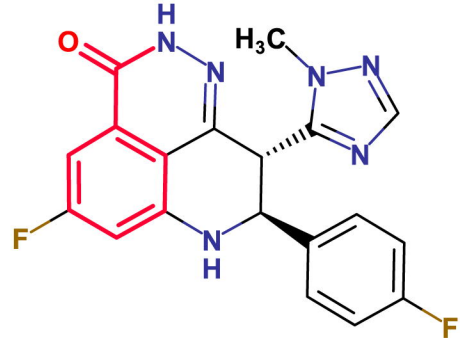

Talazoparib

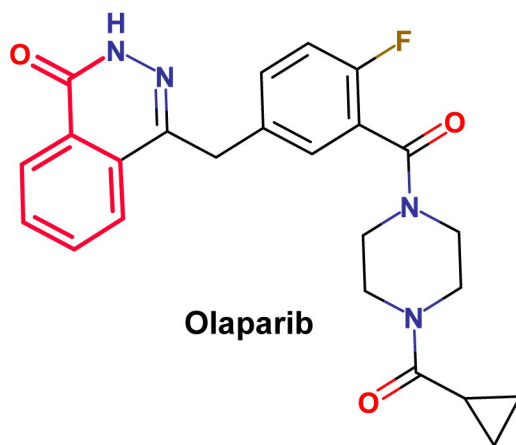

Olaparib

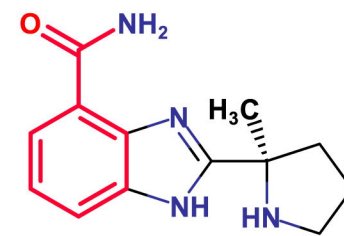

Veliparib

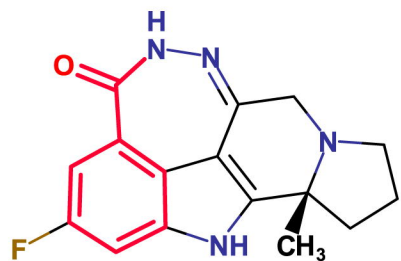

Rucaparib

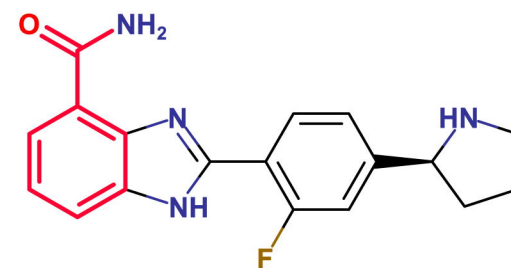

A-966492

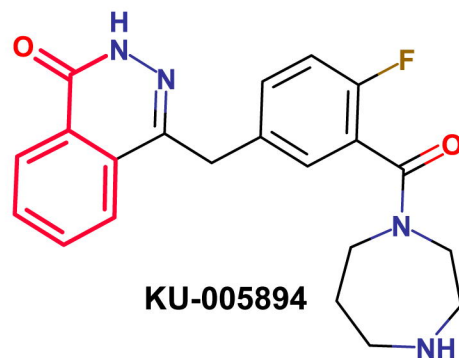

KU-005894

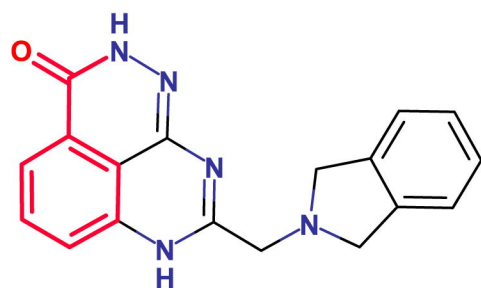

E-7449

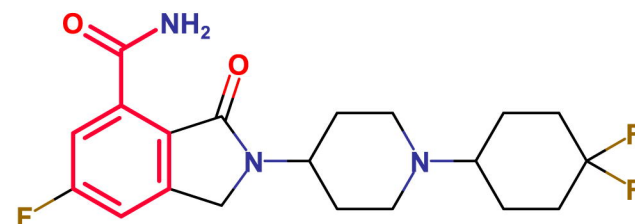

NMS-P118

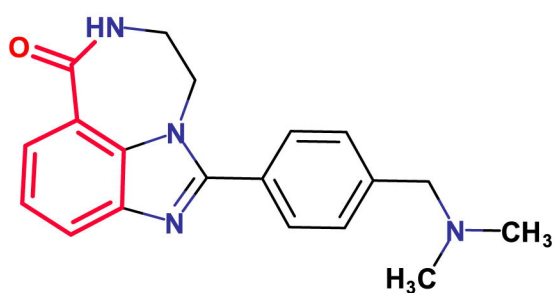

AG-1436

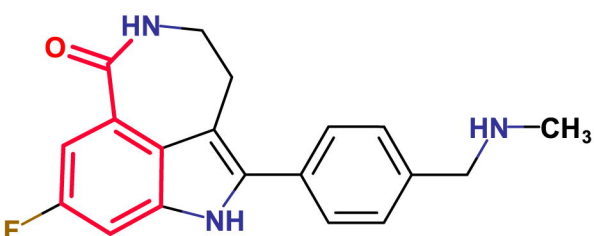

BGB-290

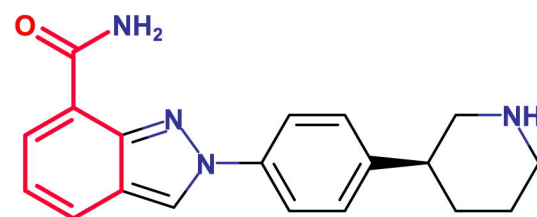

Niraparib



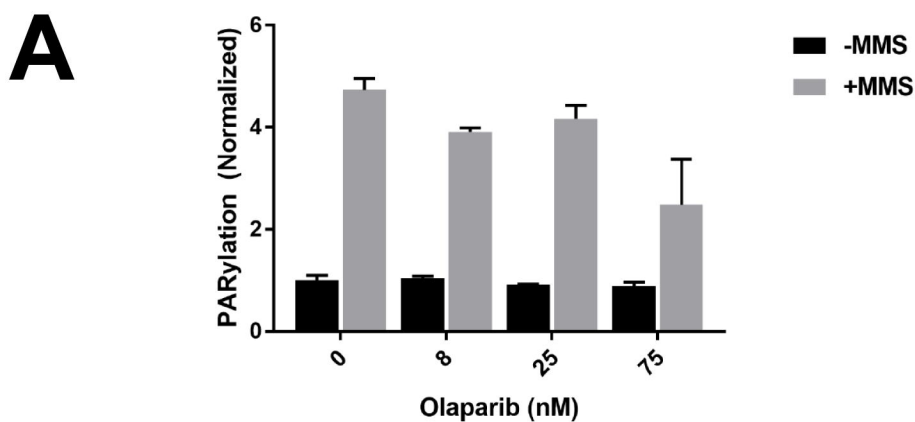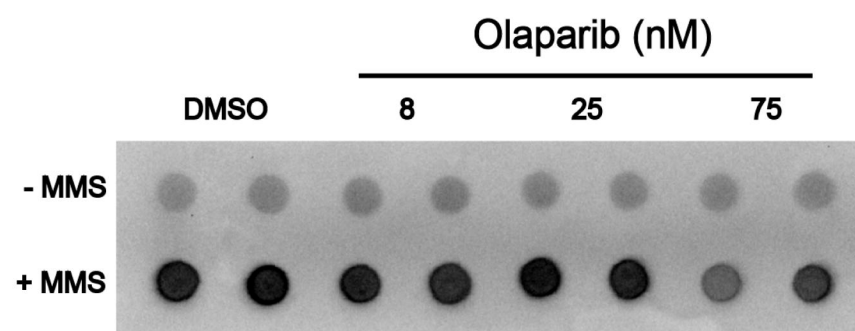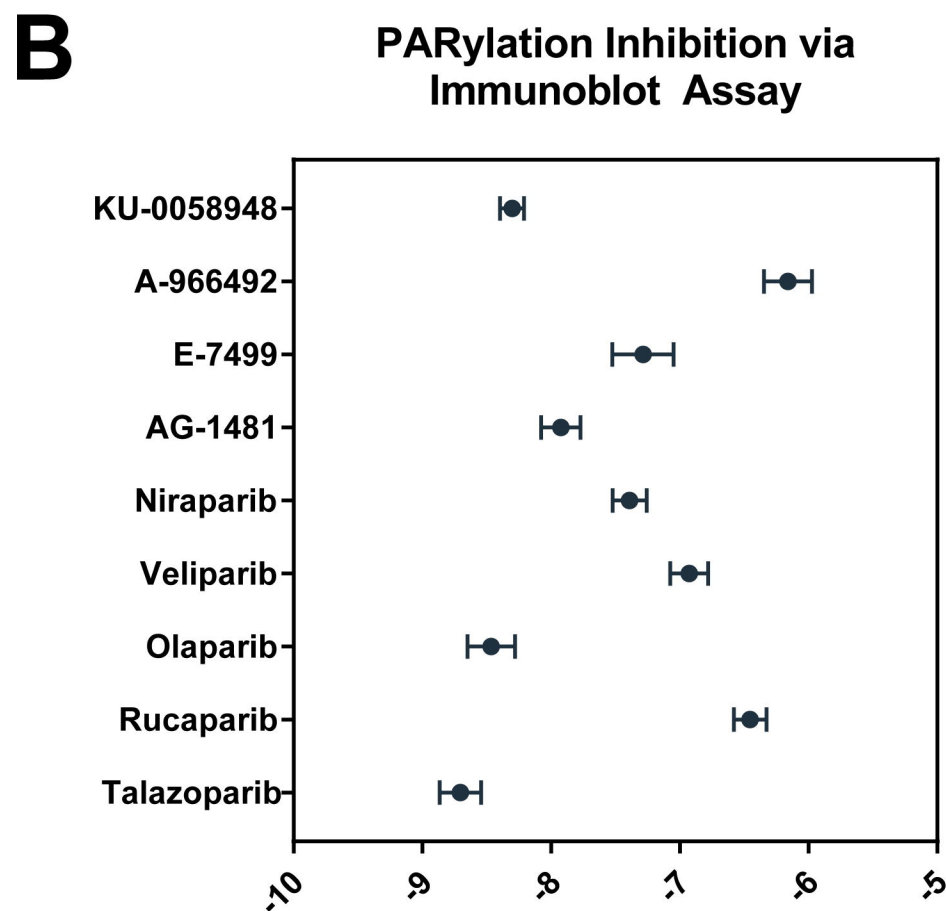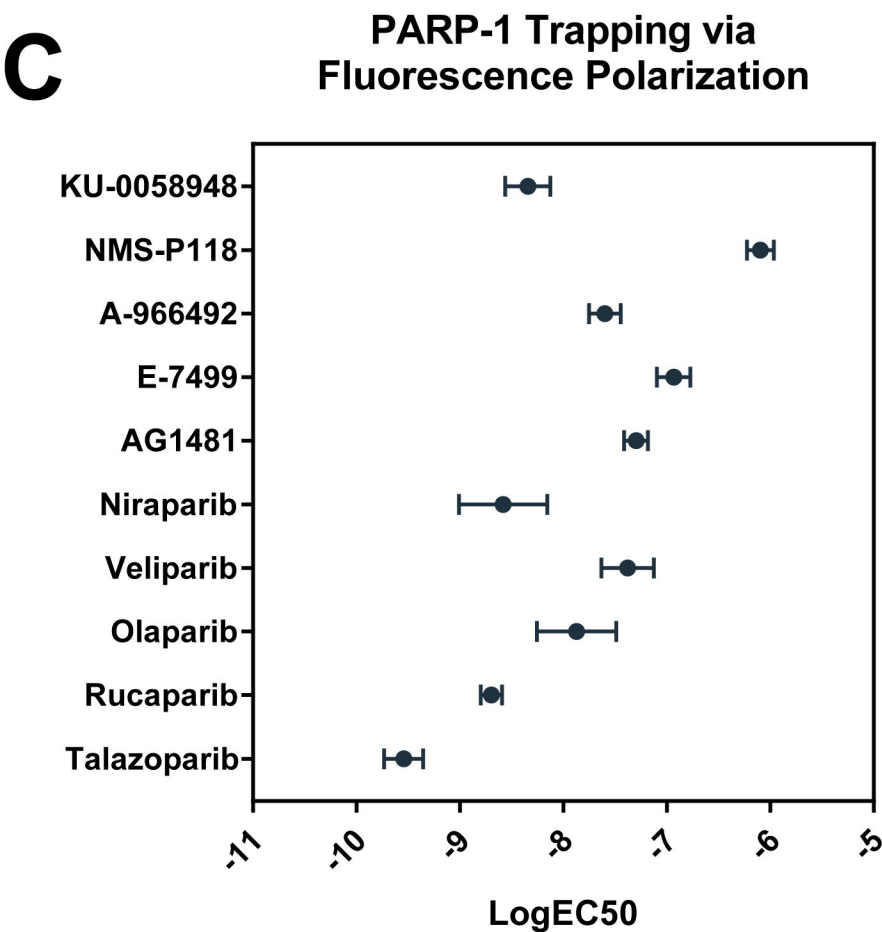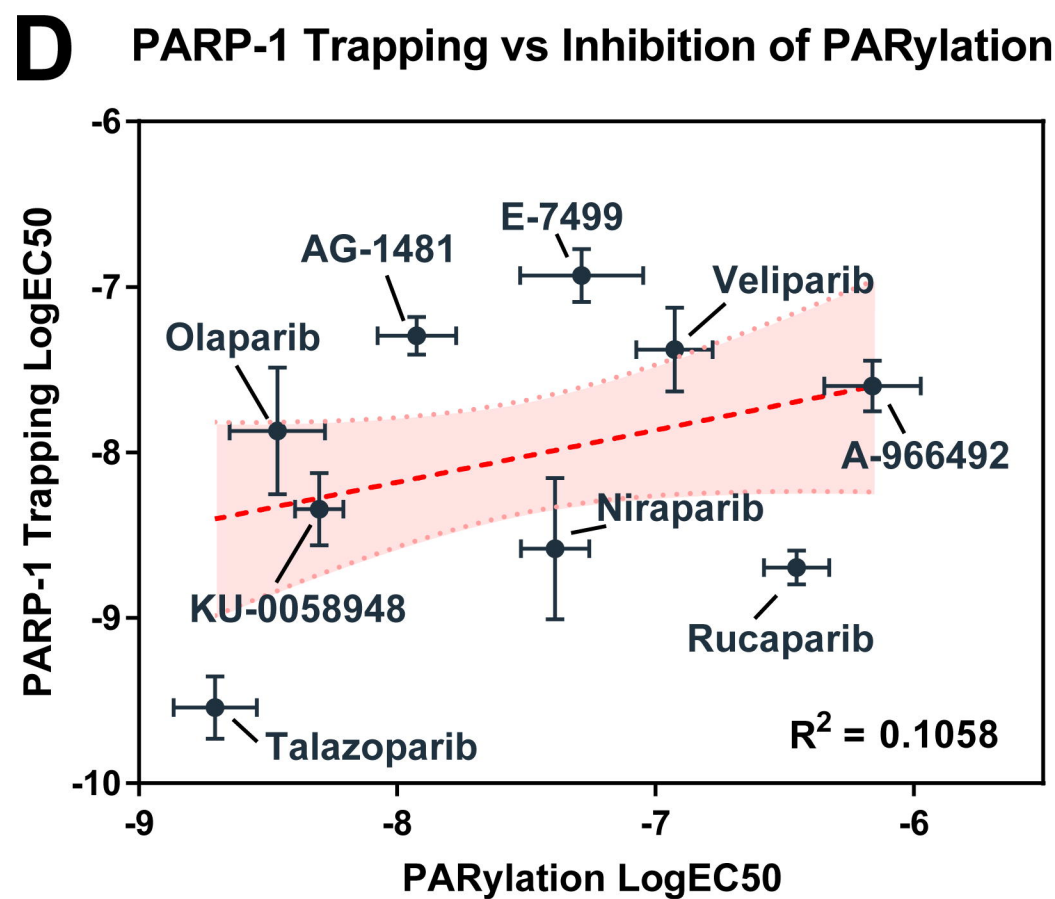

### A Wild-Type Growth Inhibition vs Inhibition of PARylation

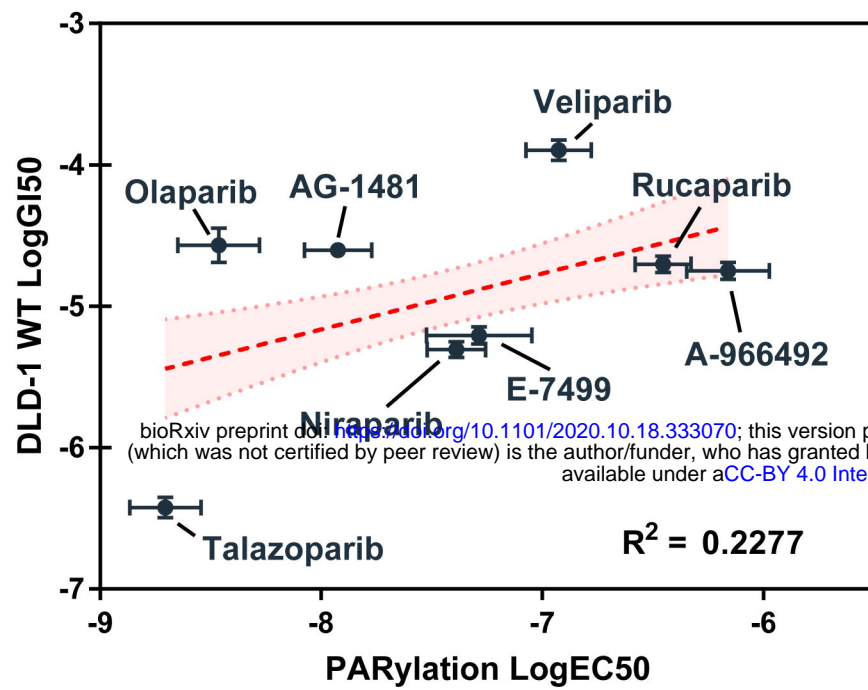

### Wild-Type Growth Inhibition vs PARP-1 Trapping Potency

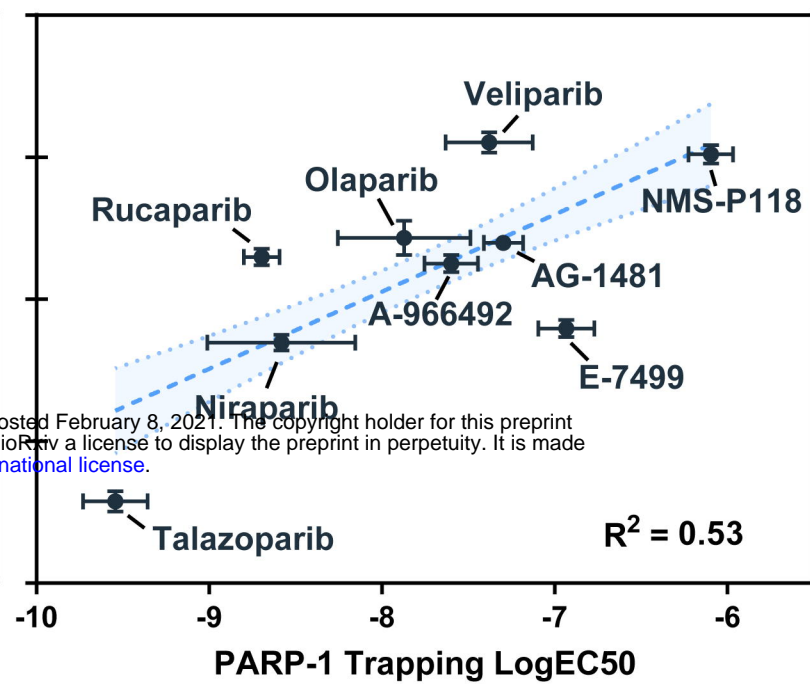

### B BRCA2 -/- Growth Inhibition vs Inhibition of PARylation

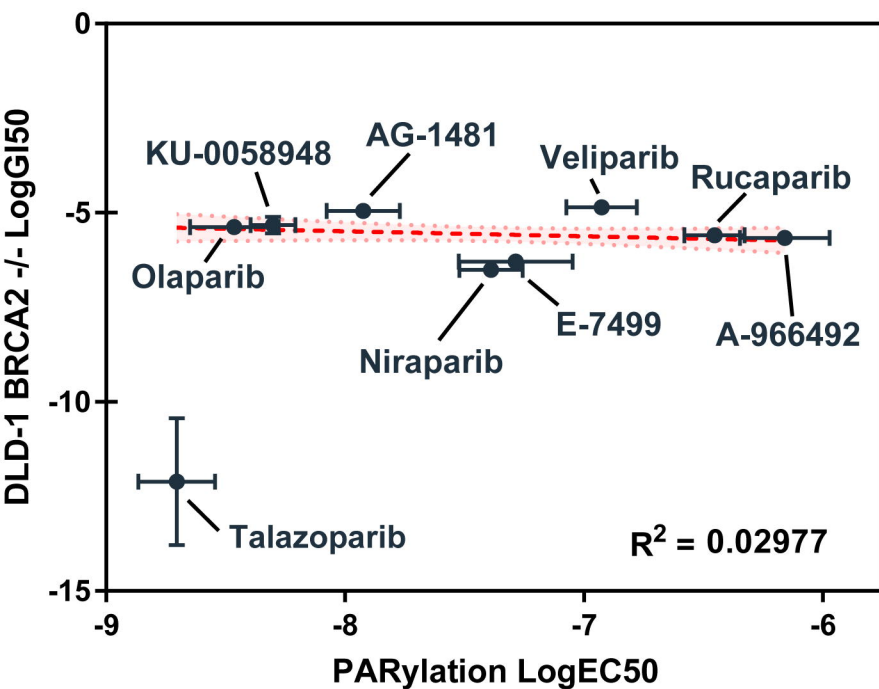

### BRCA2 -/- Growth Inhibition vs PARP-1 Trapping Potency

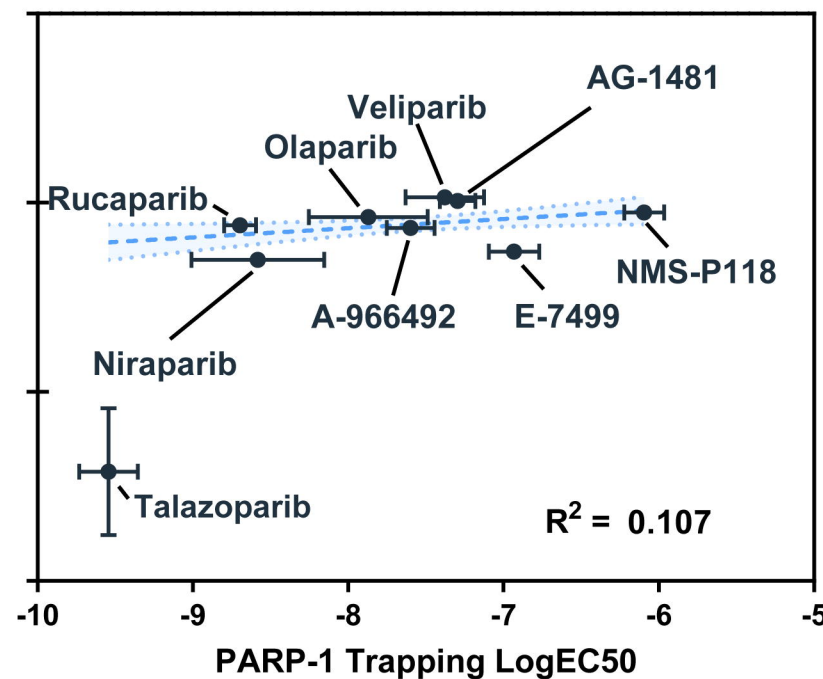

### C Synthetic Lethality vs Inhibition of PARylation

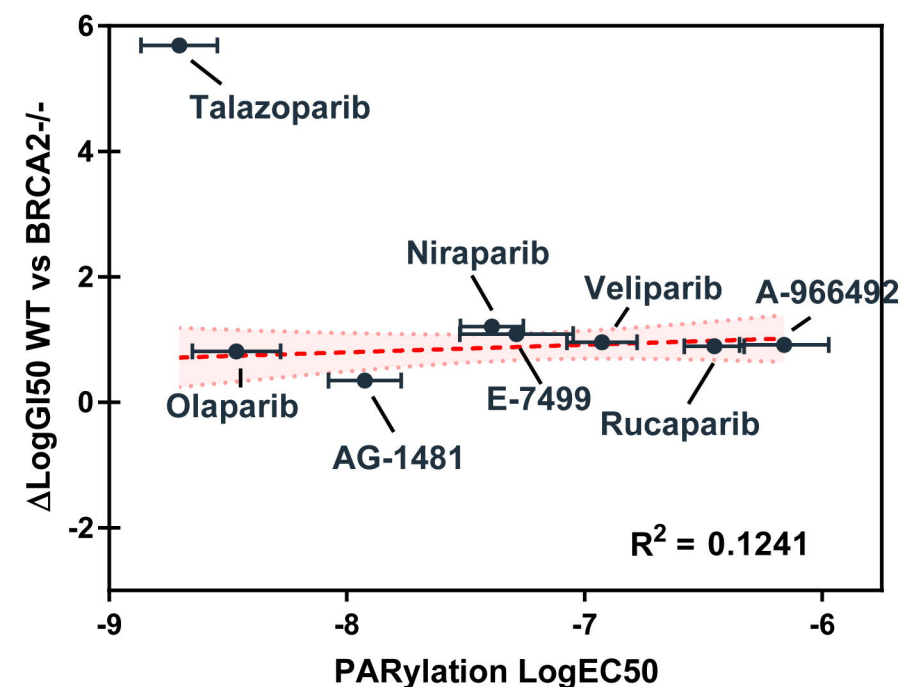

### Synthetic Lethality vs PARP-1 Trapping Potency

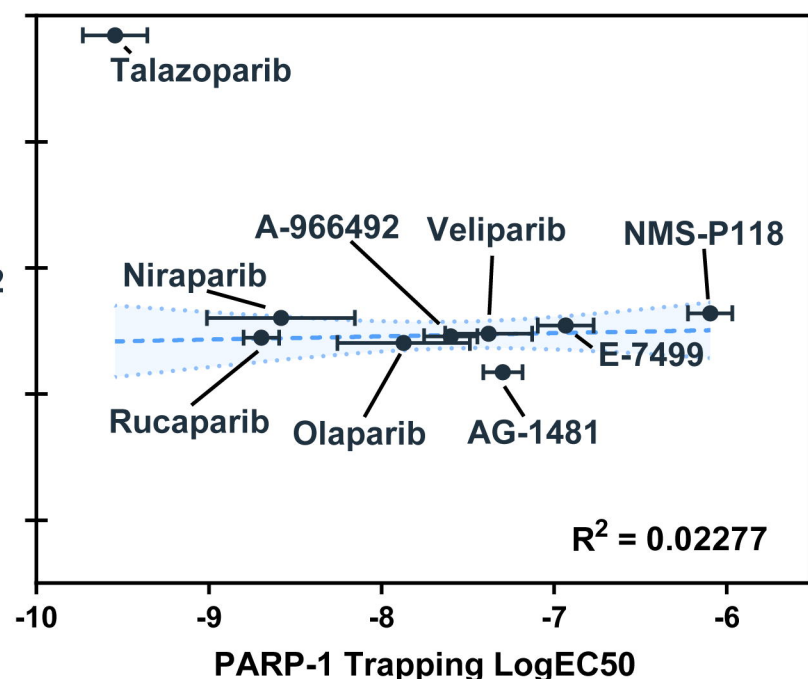

## PARPi Trapping, PARylation, and Growth Inhibition

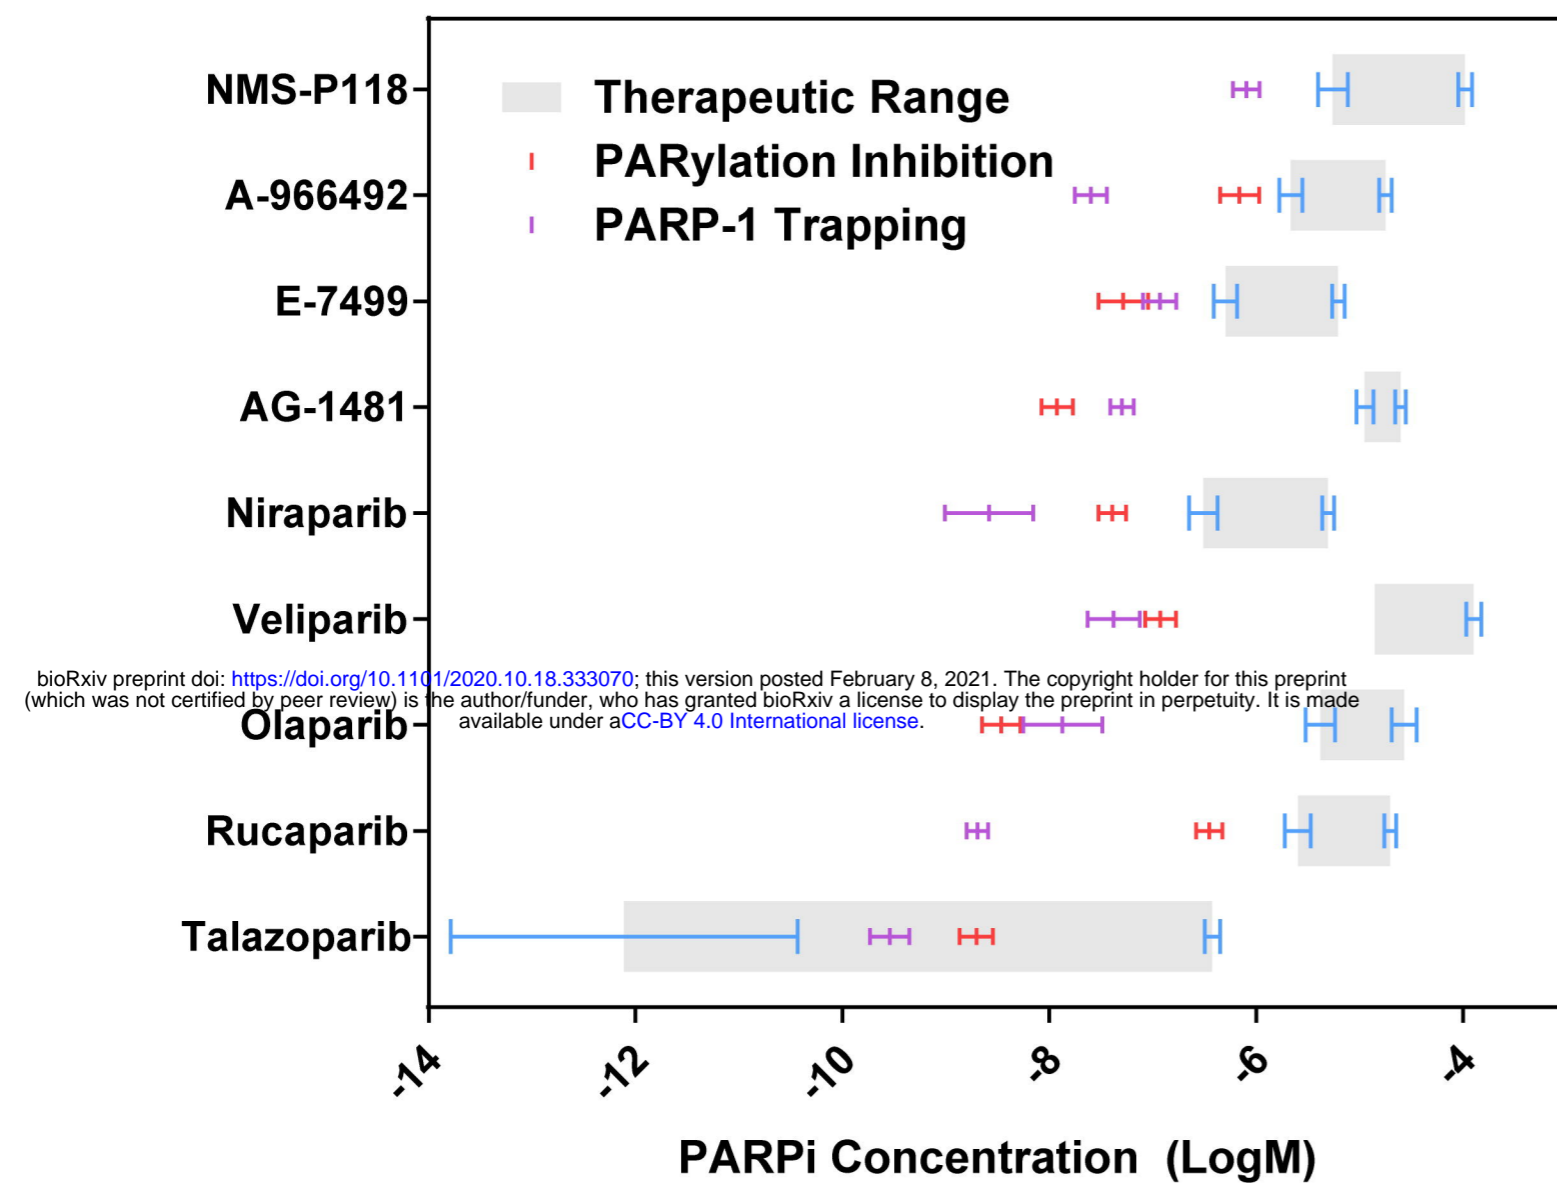

## B

| PARP Inhibitor | Trapping LogIC50 | PARylation LogIC50 |
|----------------|------------------|--------------------|
| Talazoparib    | -9.543           | -8.705             |
| Rucaparib      | -8.696           | -6.454             |
| Olaparib       | -7.871           | -8.464             |
| Veliparib      | -7.379           | -6.926             |
| Niraparib      | -8.582           | -7.389             |
| AG1481         | -7.296           | -7.924             |
| E-7499         | -6.932           | -7.286             |
| A-966492       | -7.598           | -6.160             |
| NMS-P118       | -6.095           | -                  |
| KU-0058948     | -8.343           | -8.302             |

## C

### DLD-1 Cell Lines Average PARPi Sensitivity Ranking

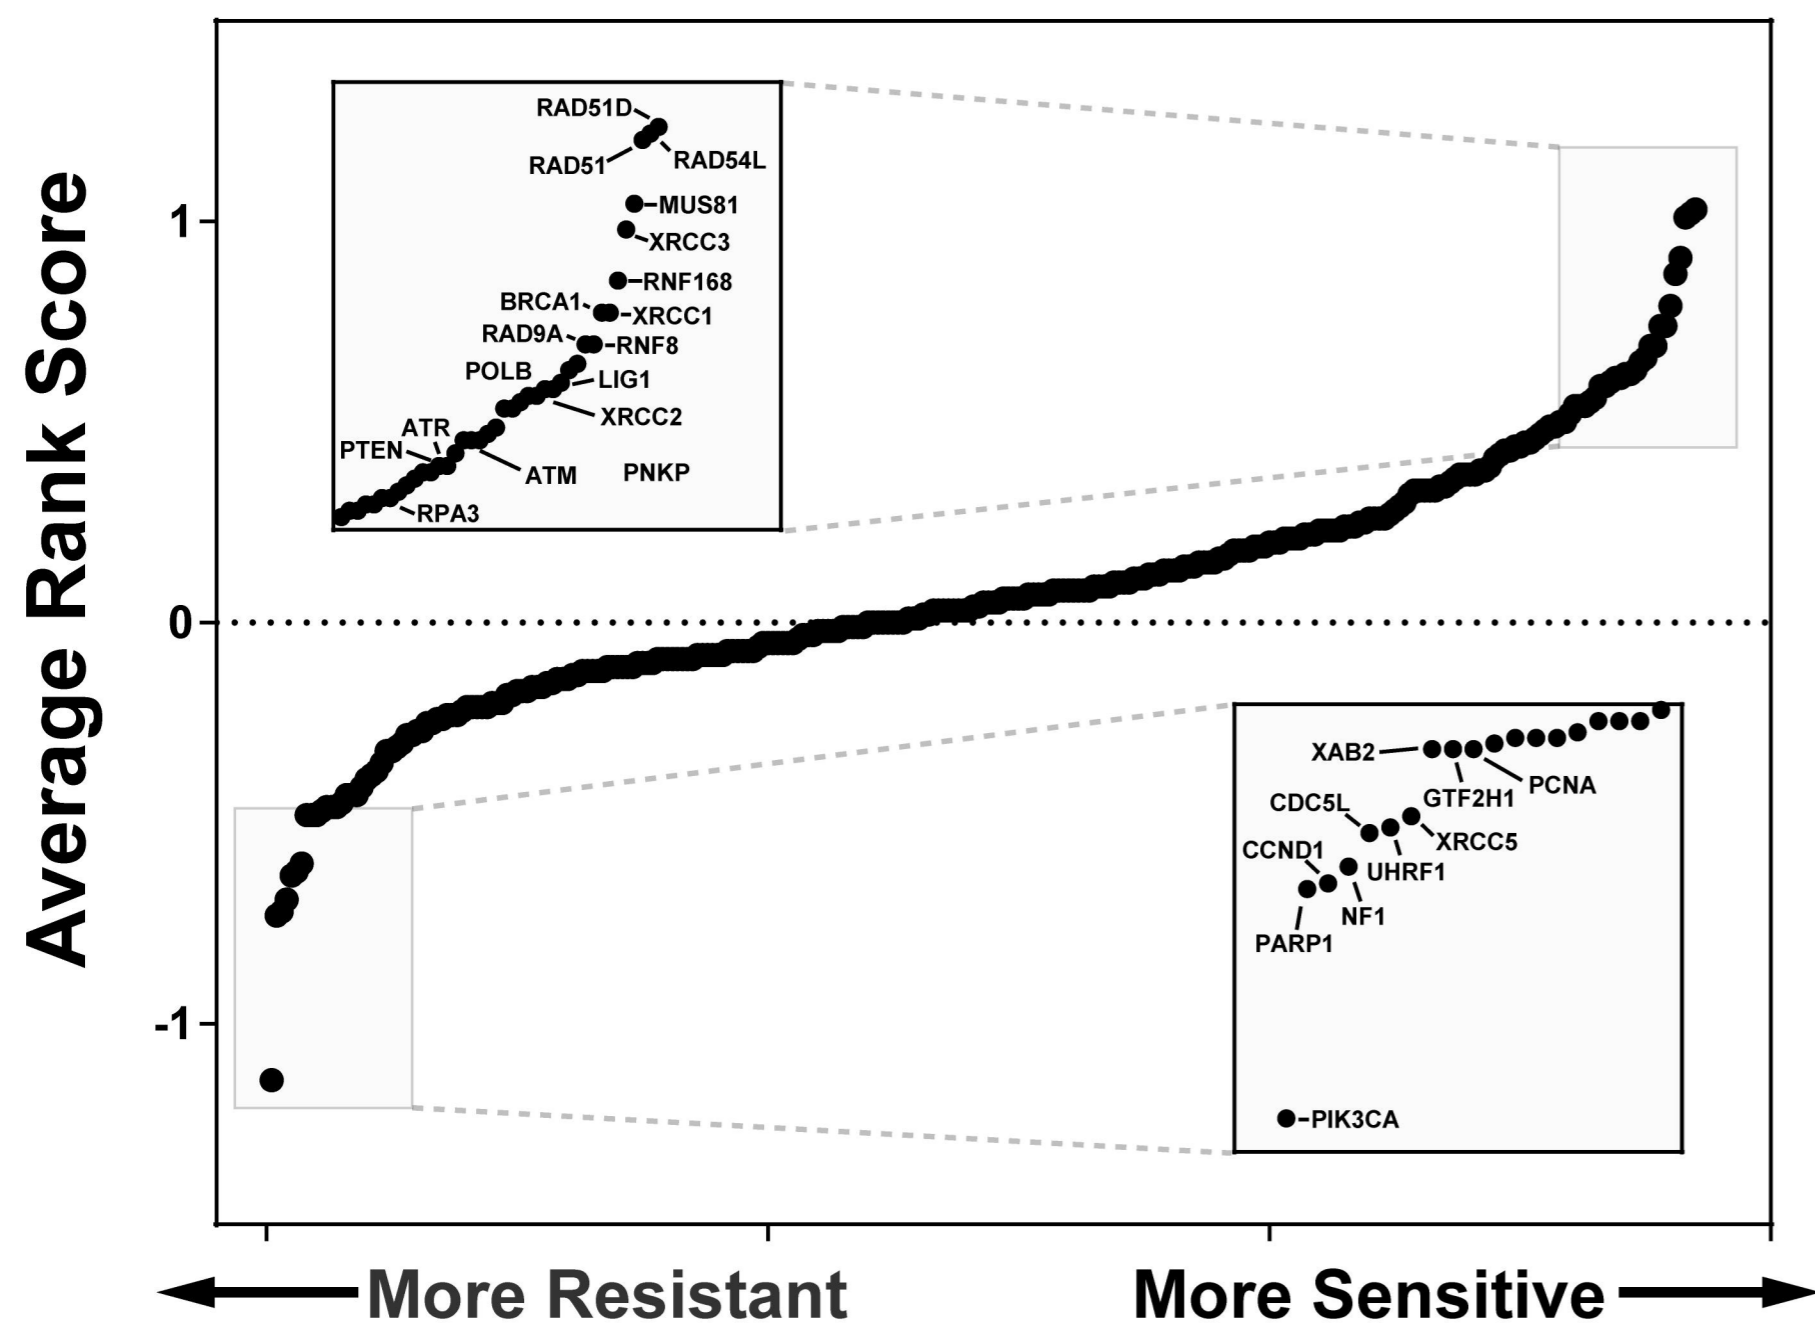

## D

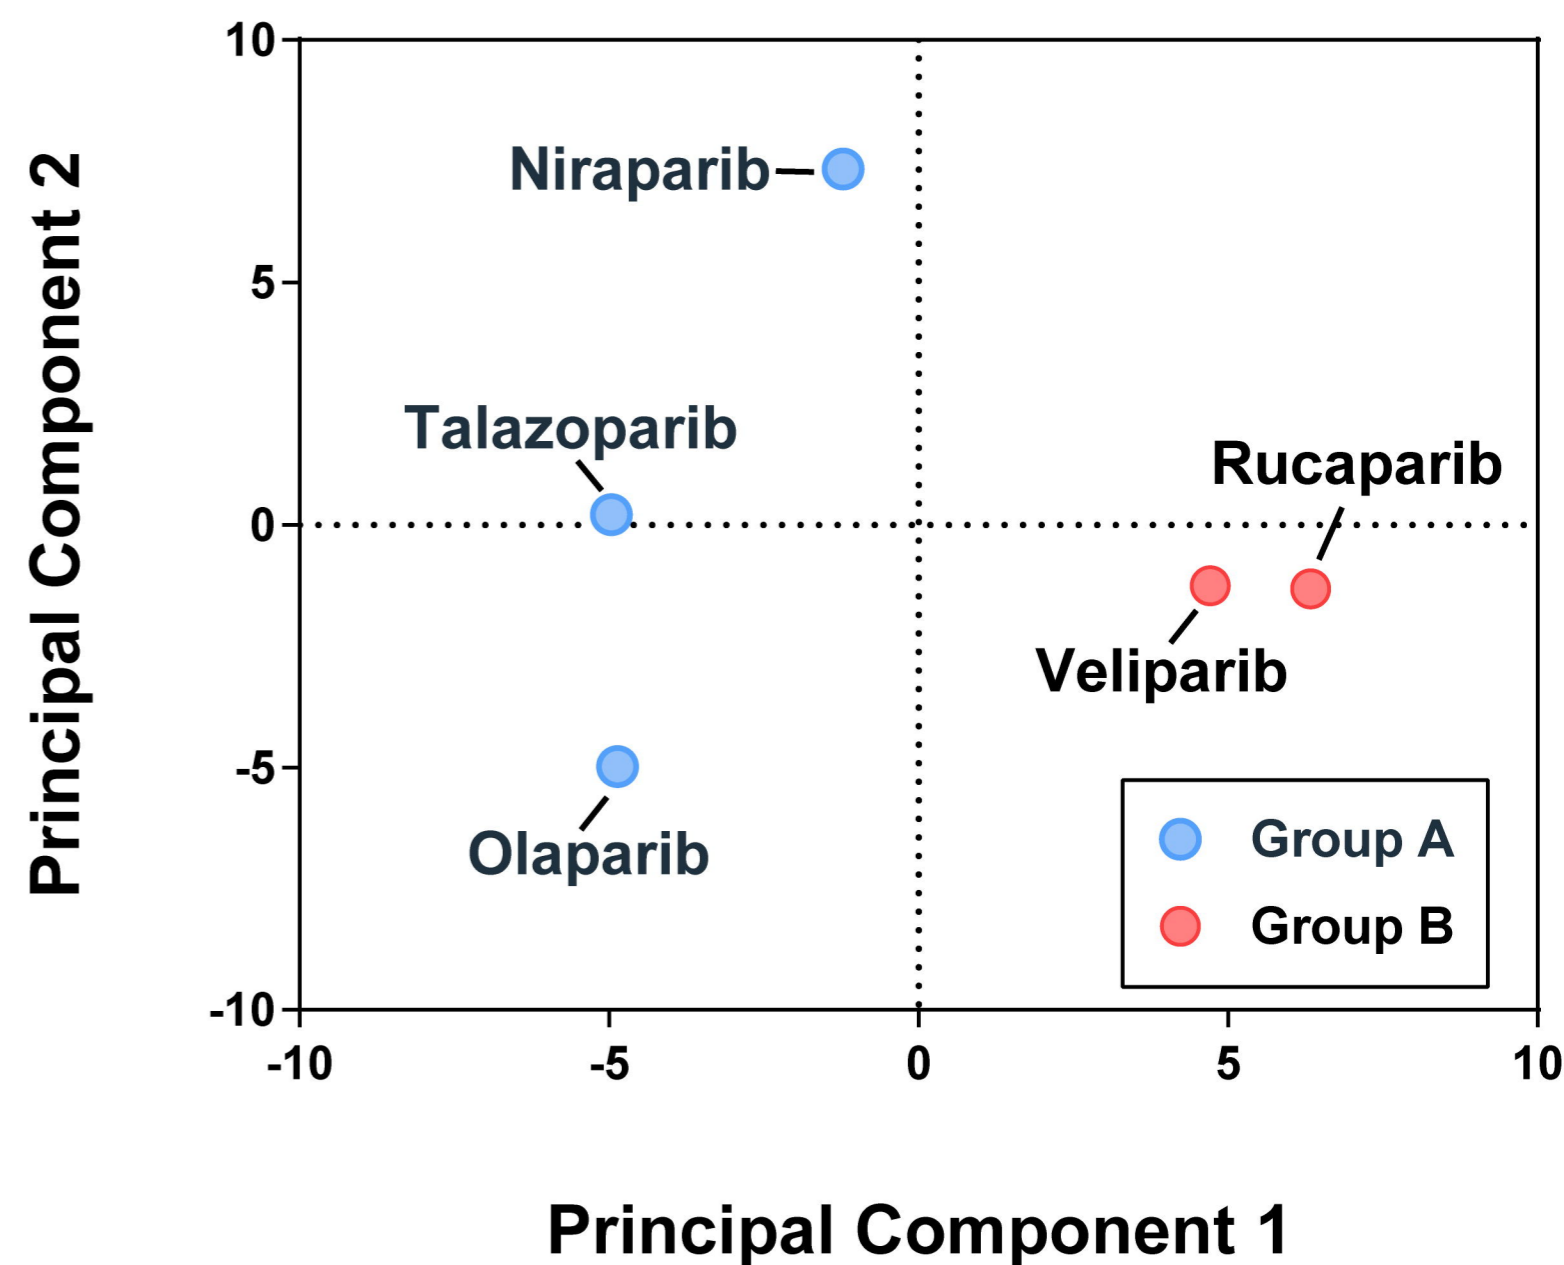

**A****Rank Score Distribution By Gene Set****Rank Score**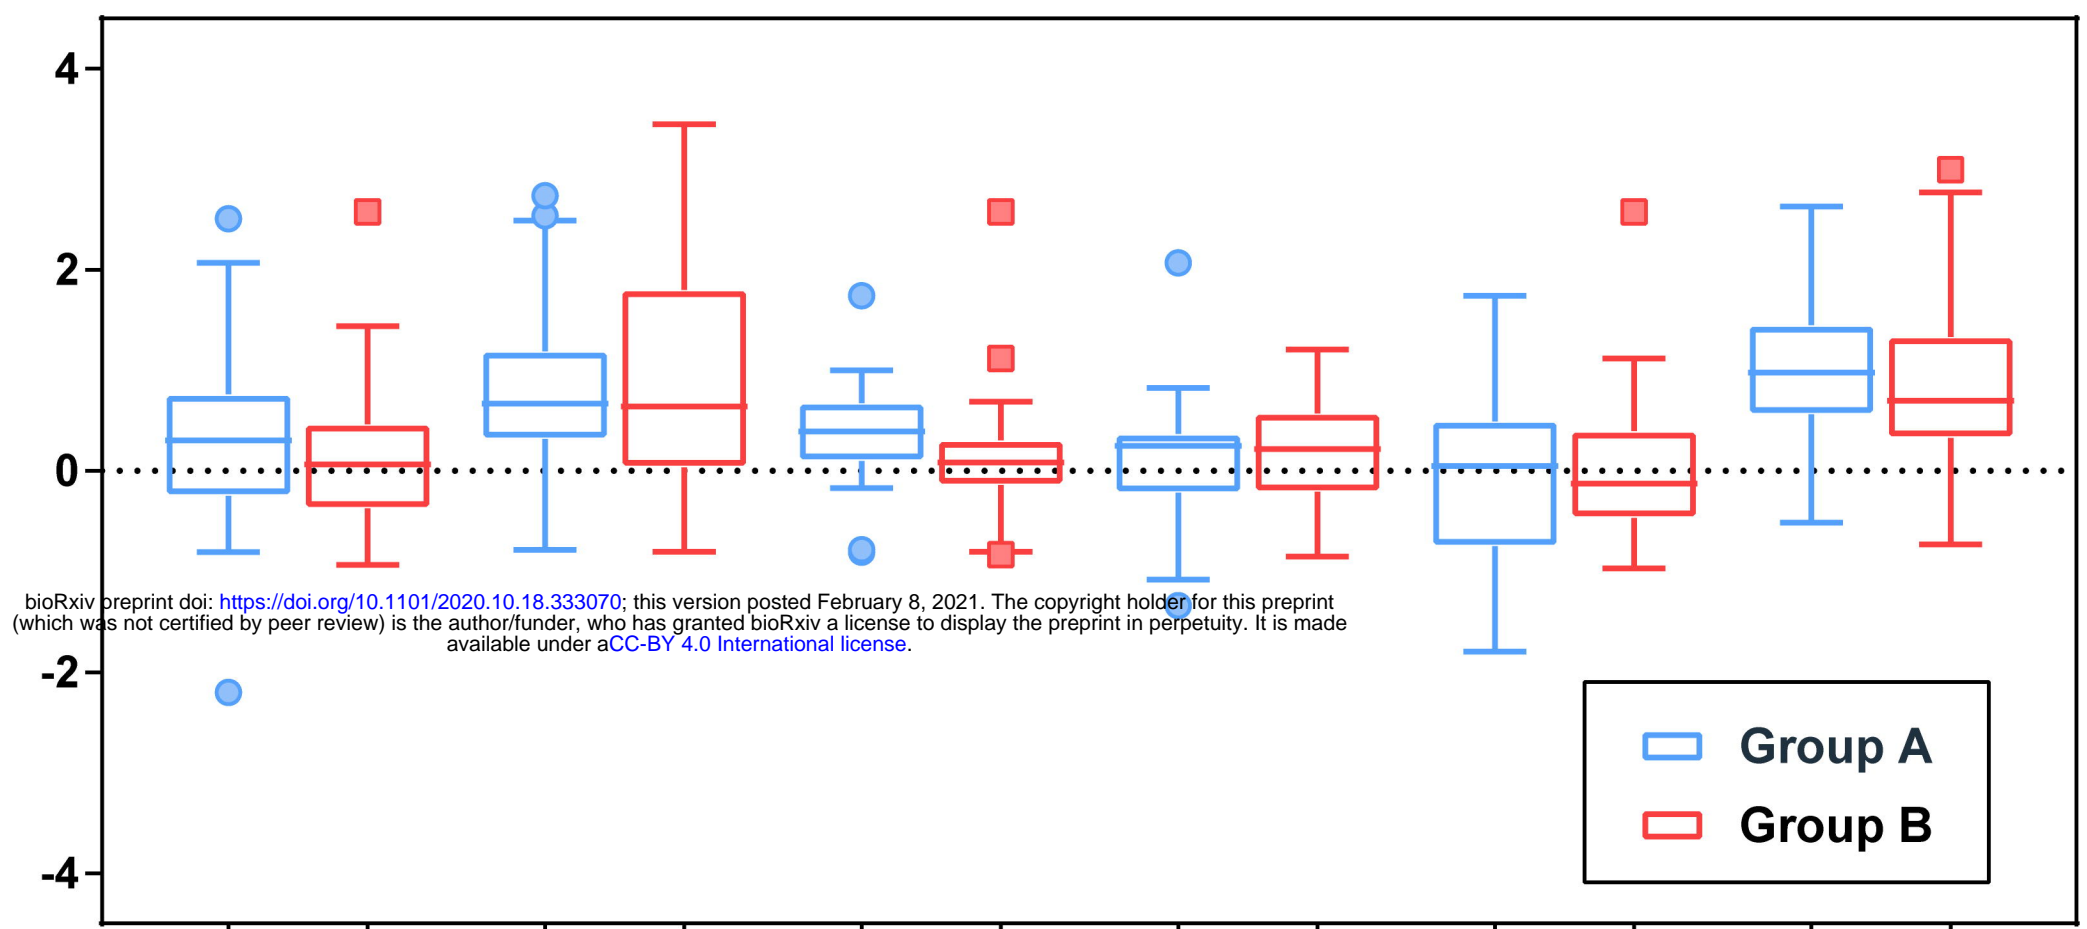**B****Base Excision Repair-Associated Proteins****Rank Score**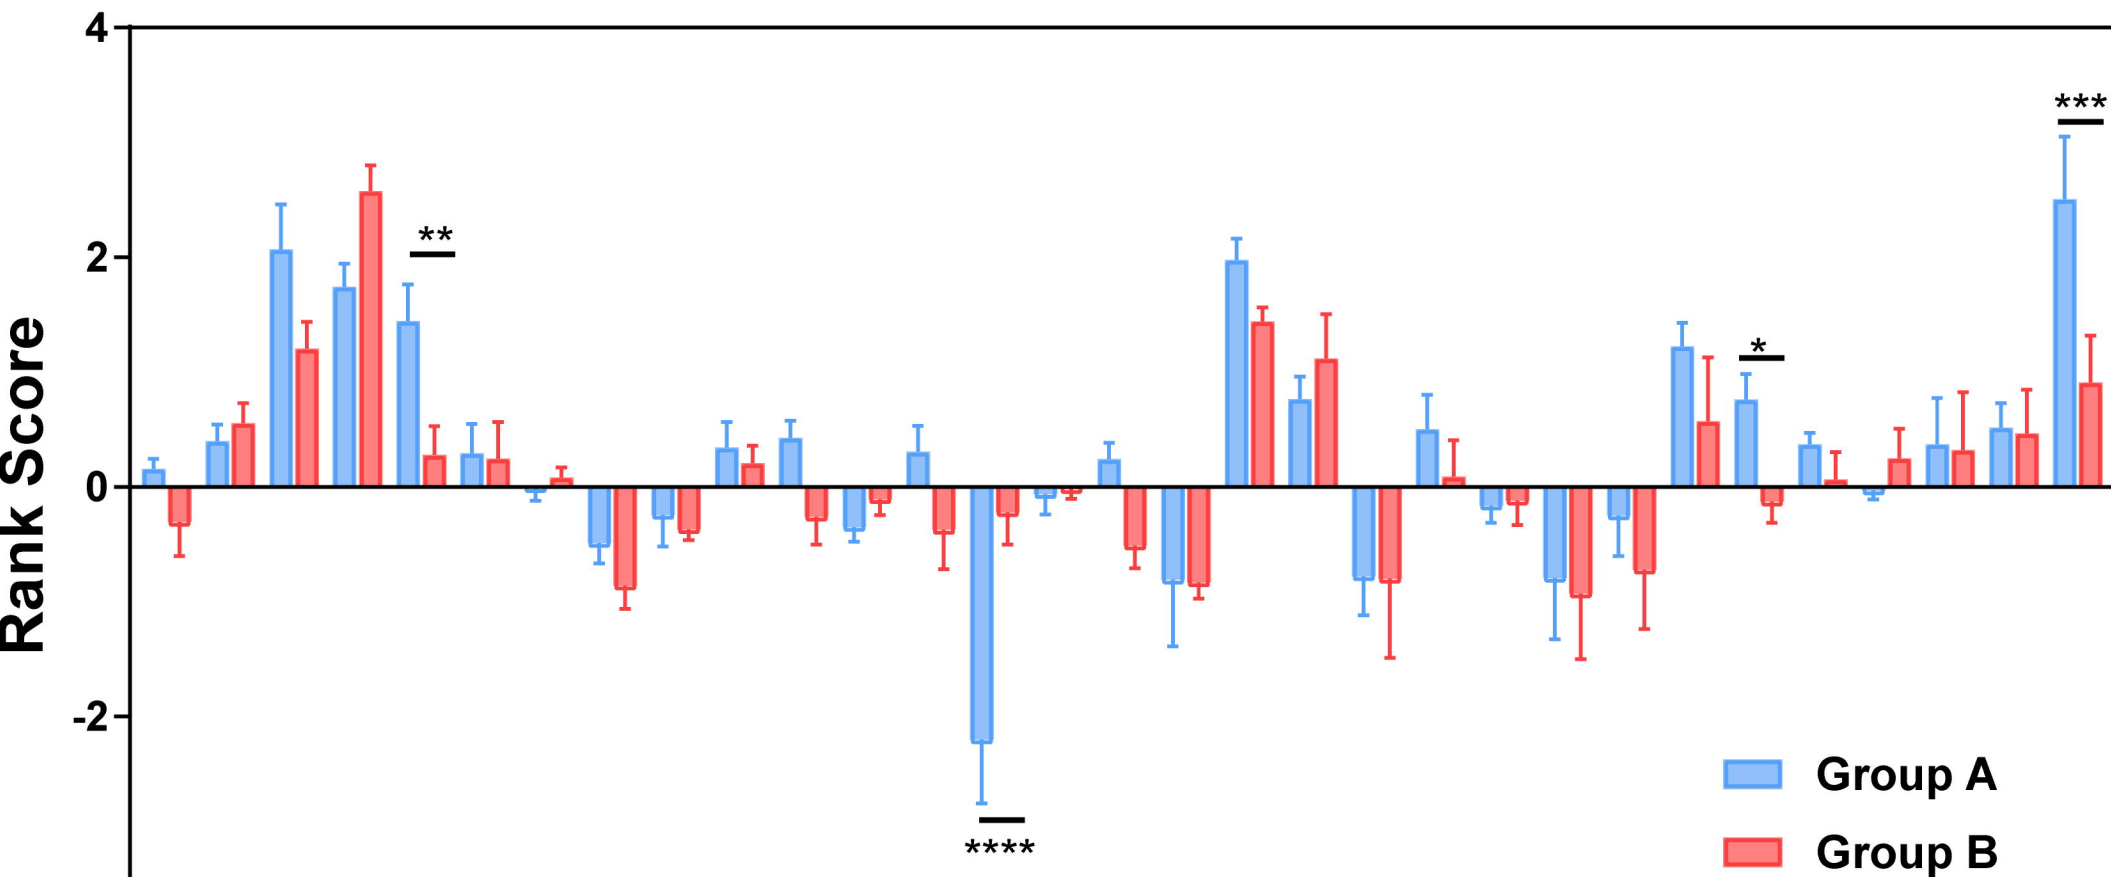**- Log10(p)**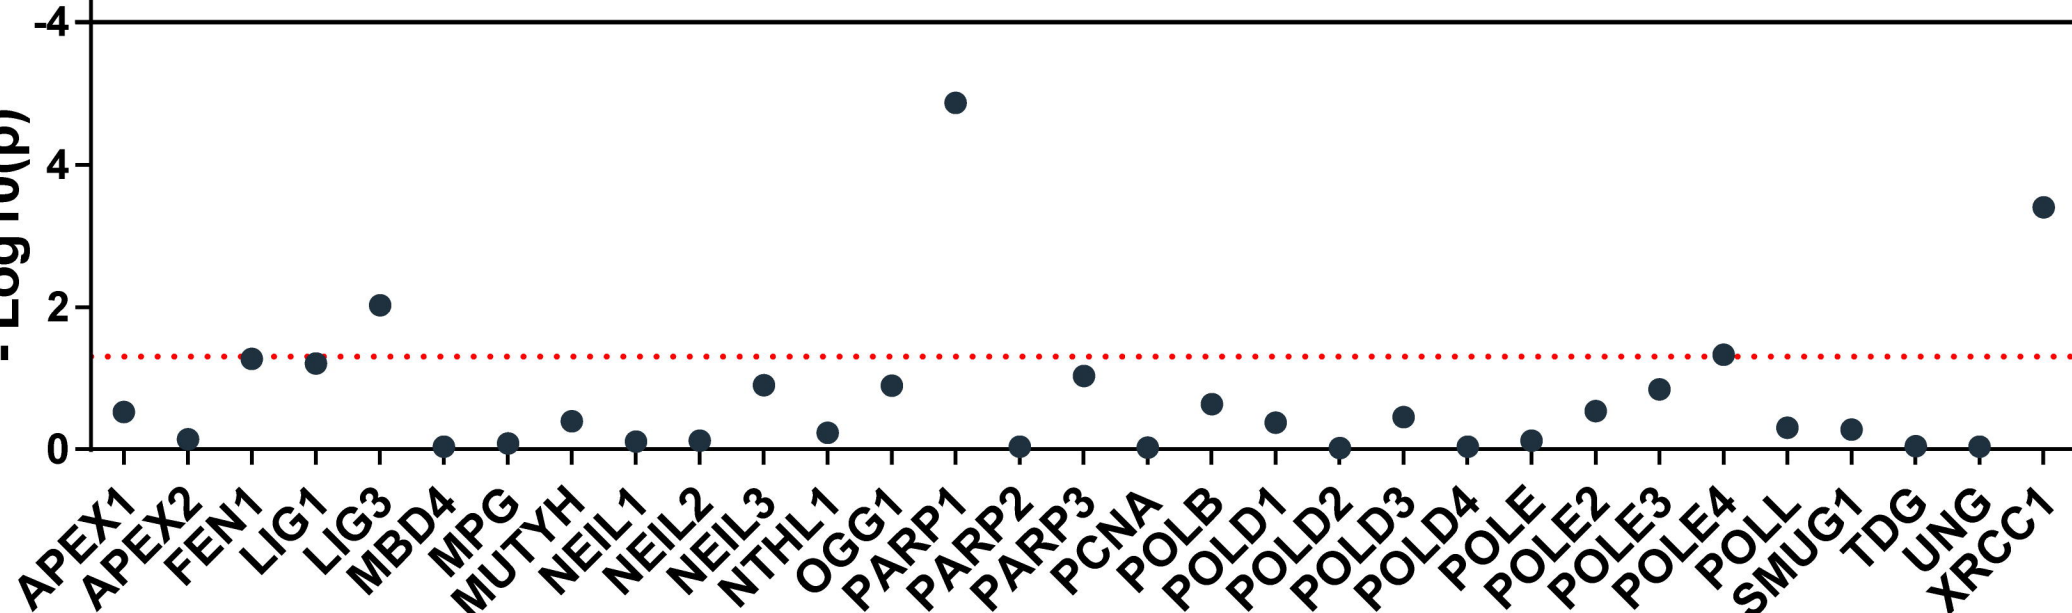

**A****DLD-1 WT Short-Term Viability**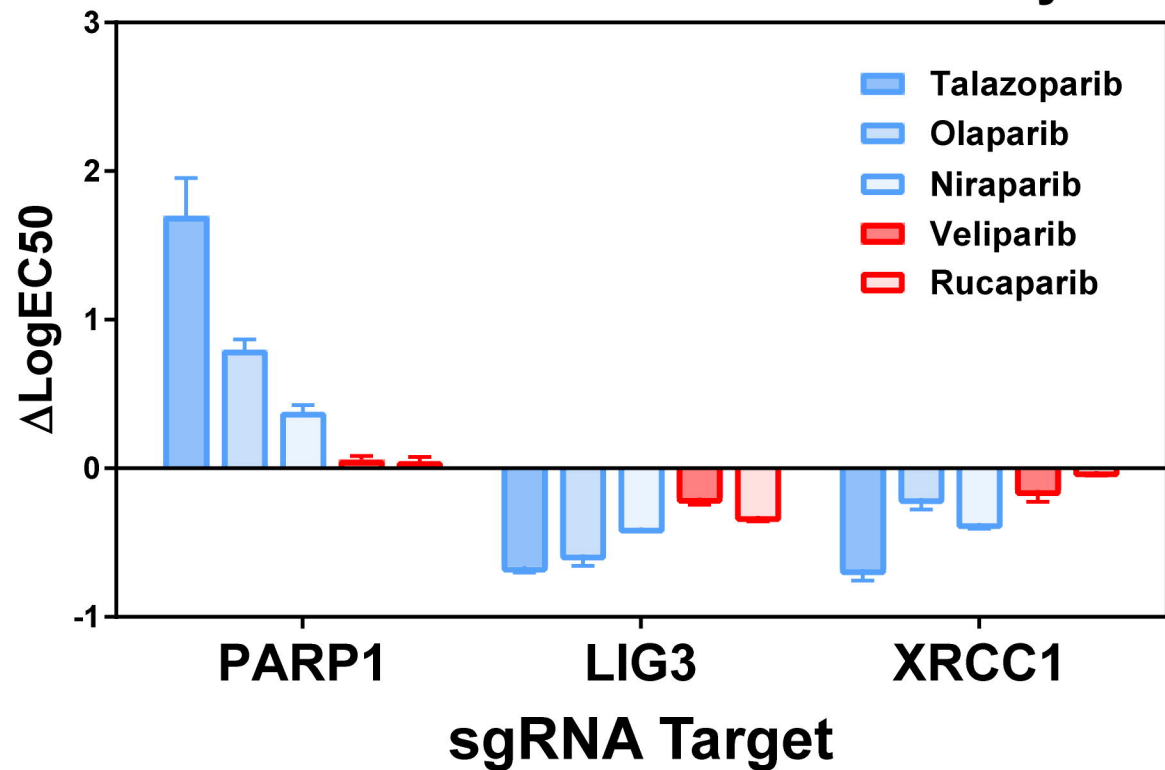**B****DLD-1 WT Short-Term Viability**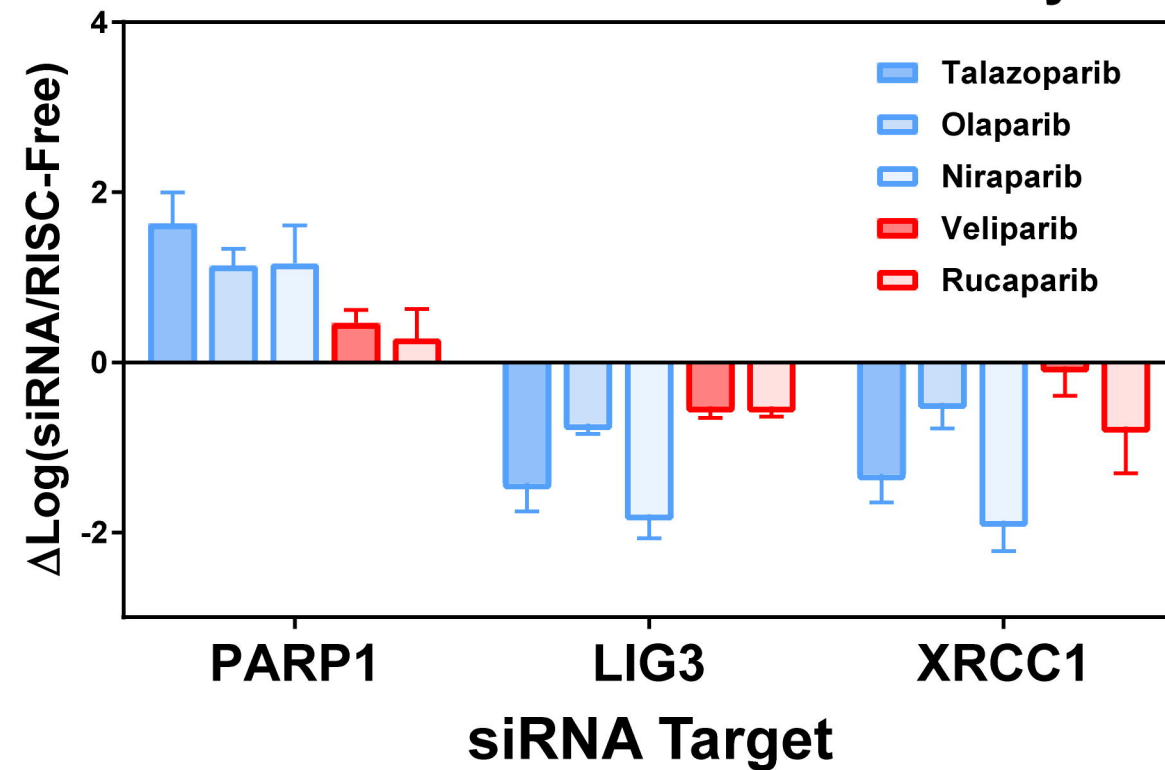**C****U2-OS Short-Term Viability**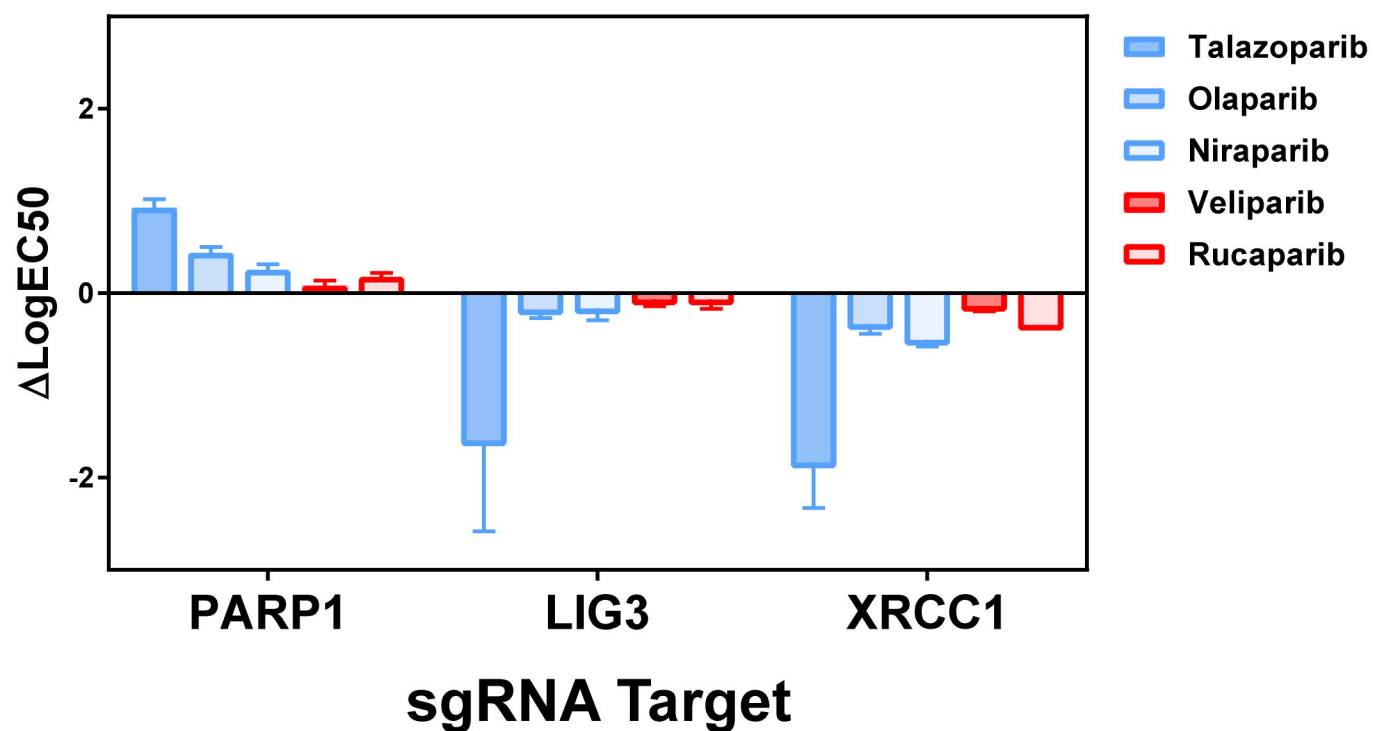

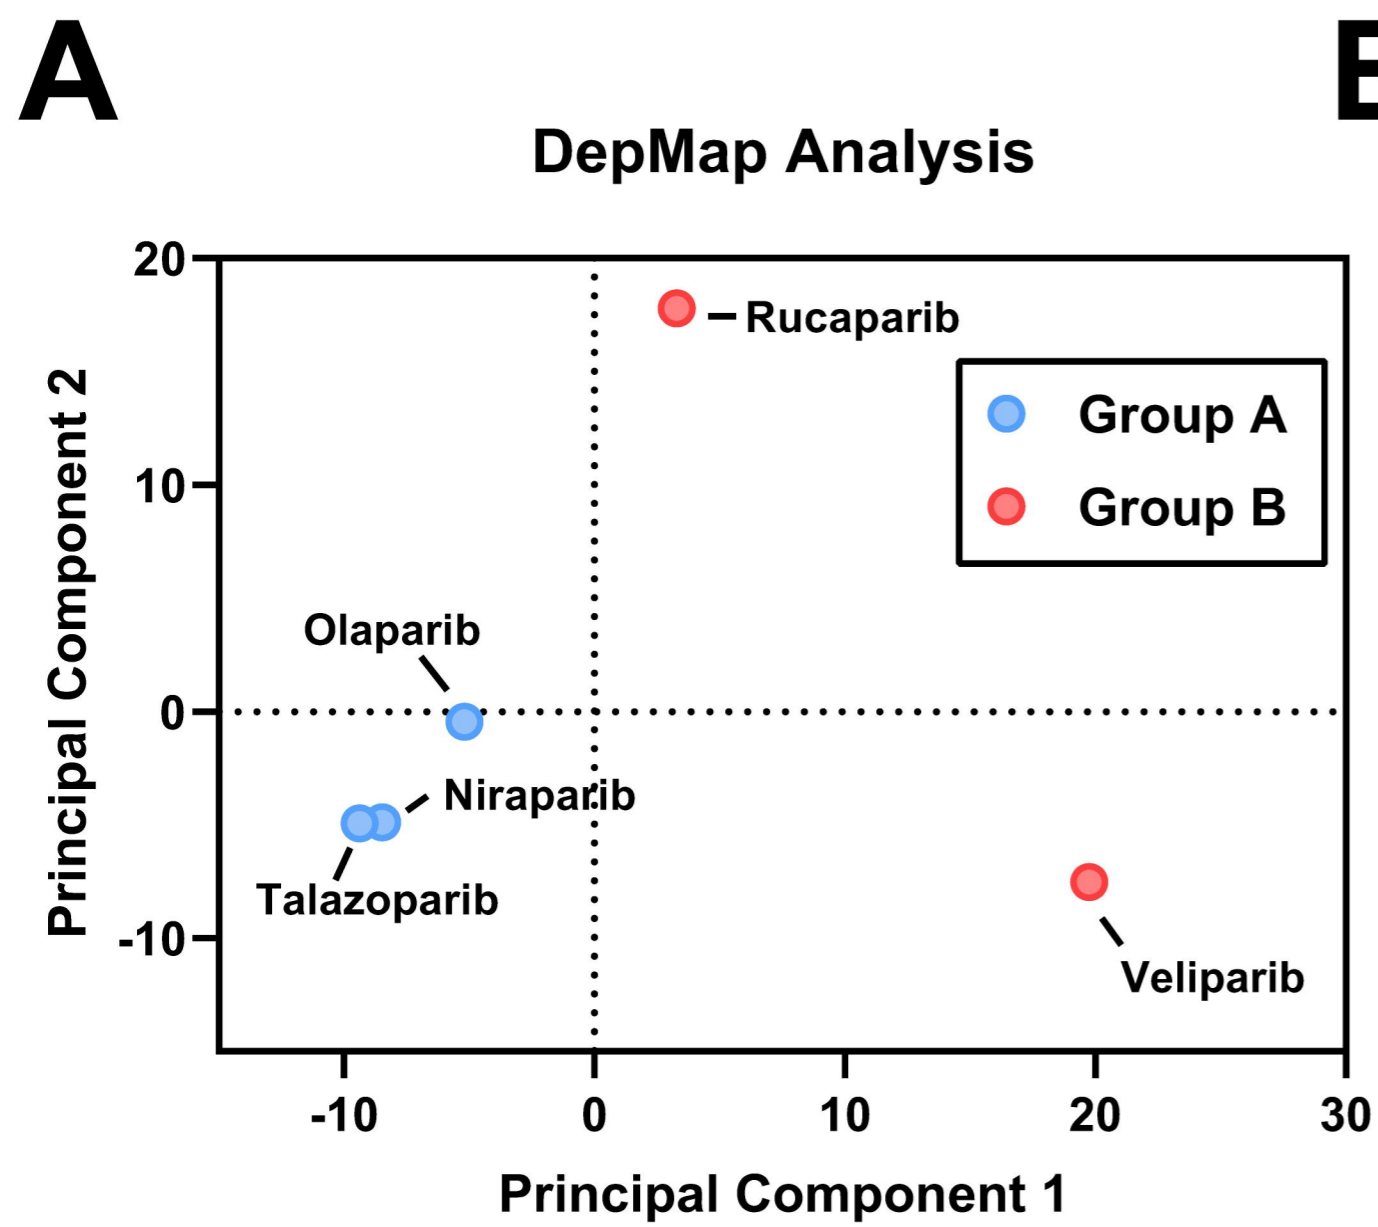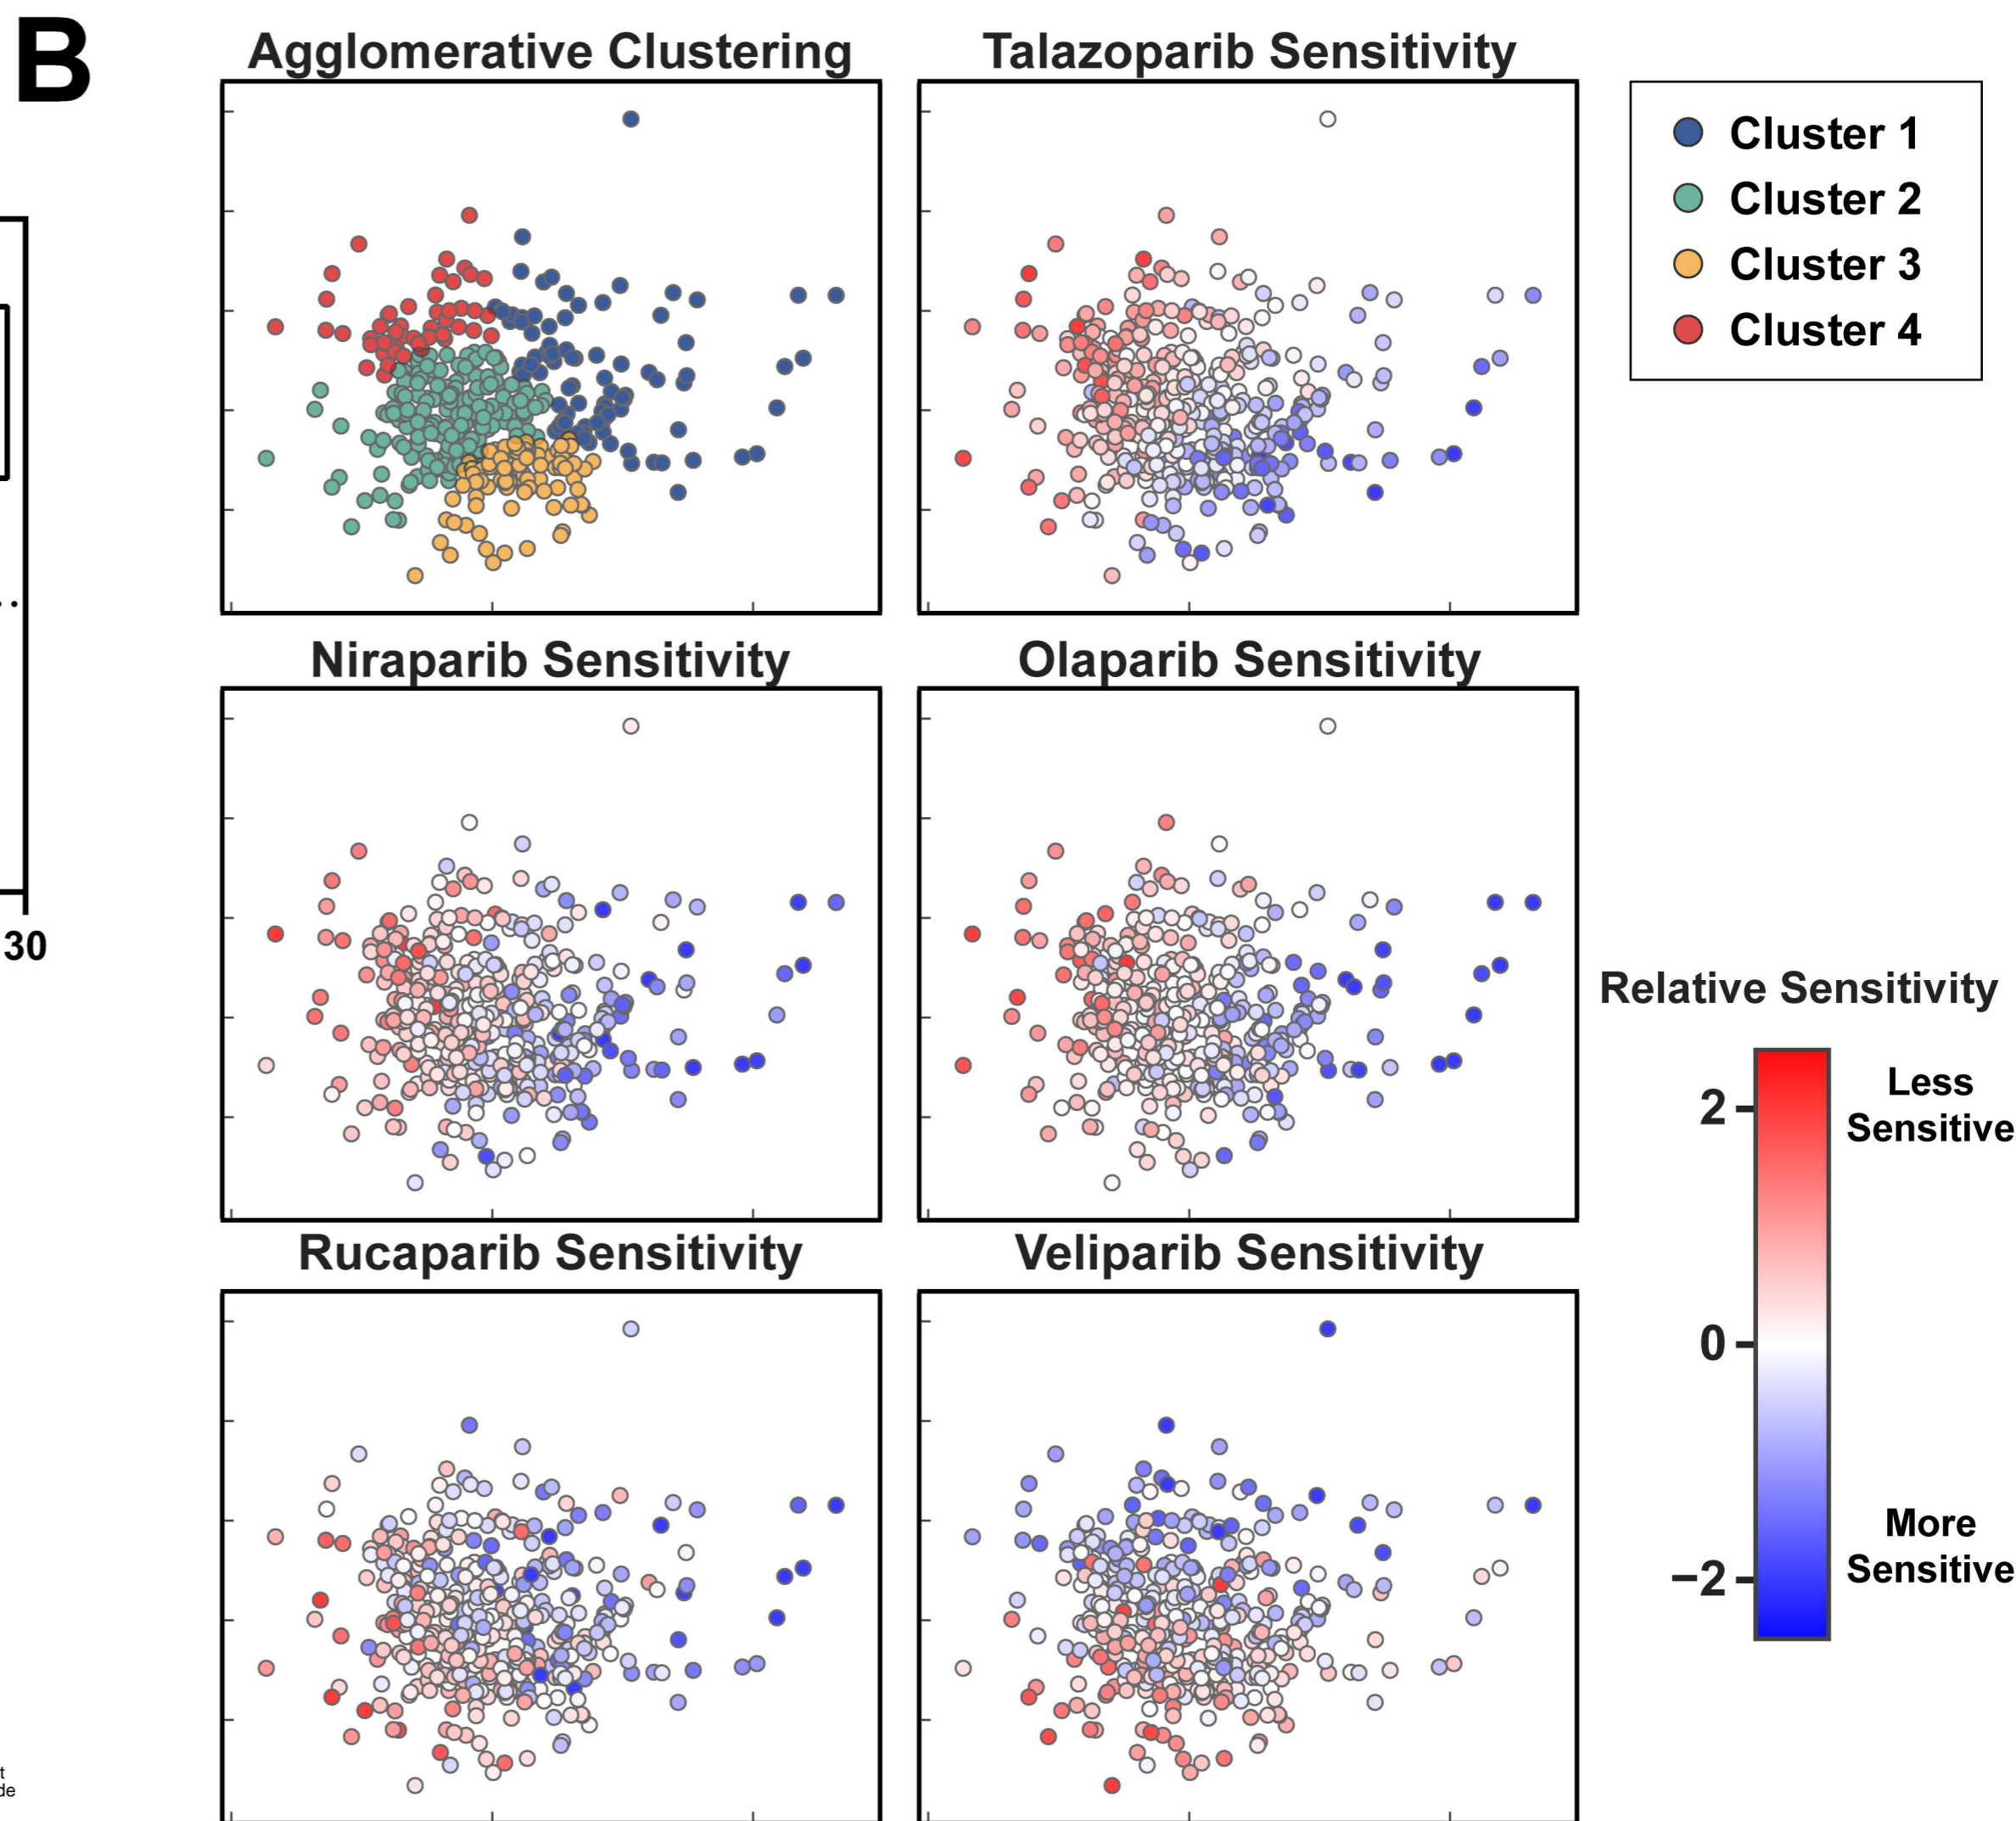

bioRxiv preprint doi: <https://doi.org/10.1101/2020.10.18.333070>; this version posted February 8, 2021. The copyright holder for this preprint (which was not certified by peer review) is the author/funder, who has granted bioRxiv a license to display the preprint in perpetuity. It is made available under aCC-BY 4.0 International license.

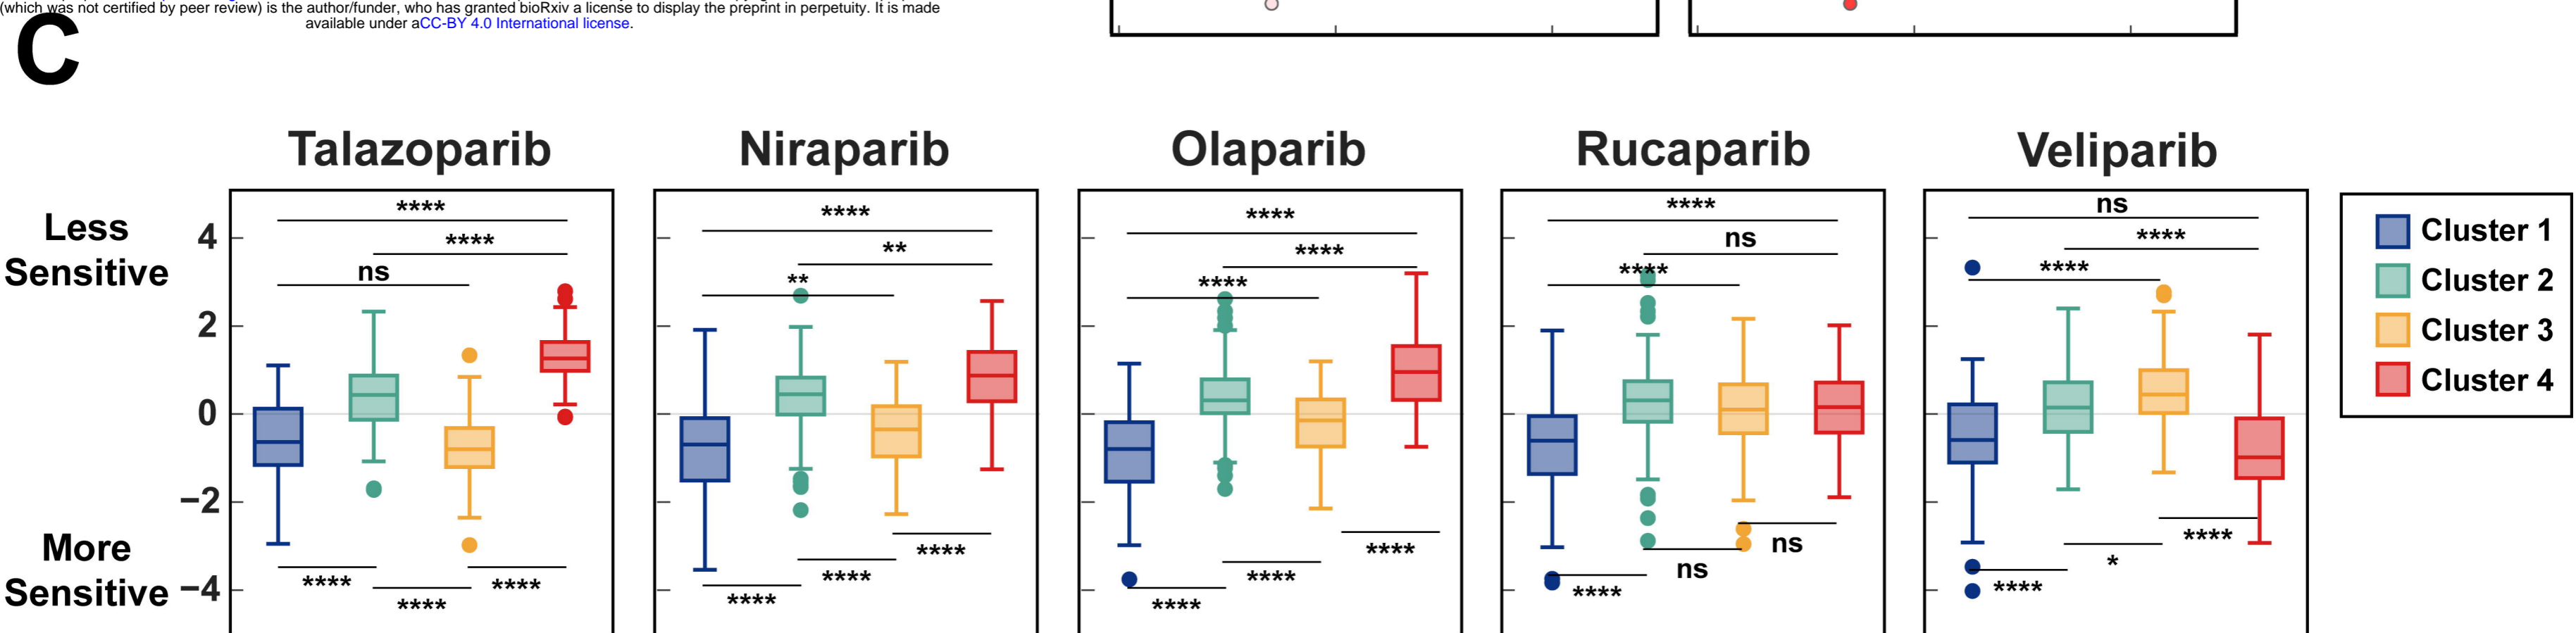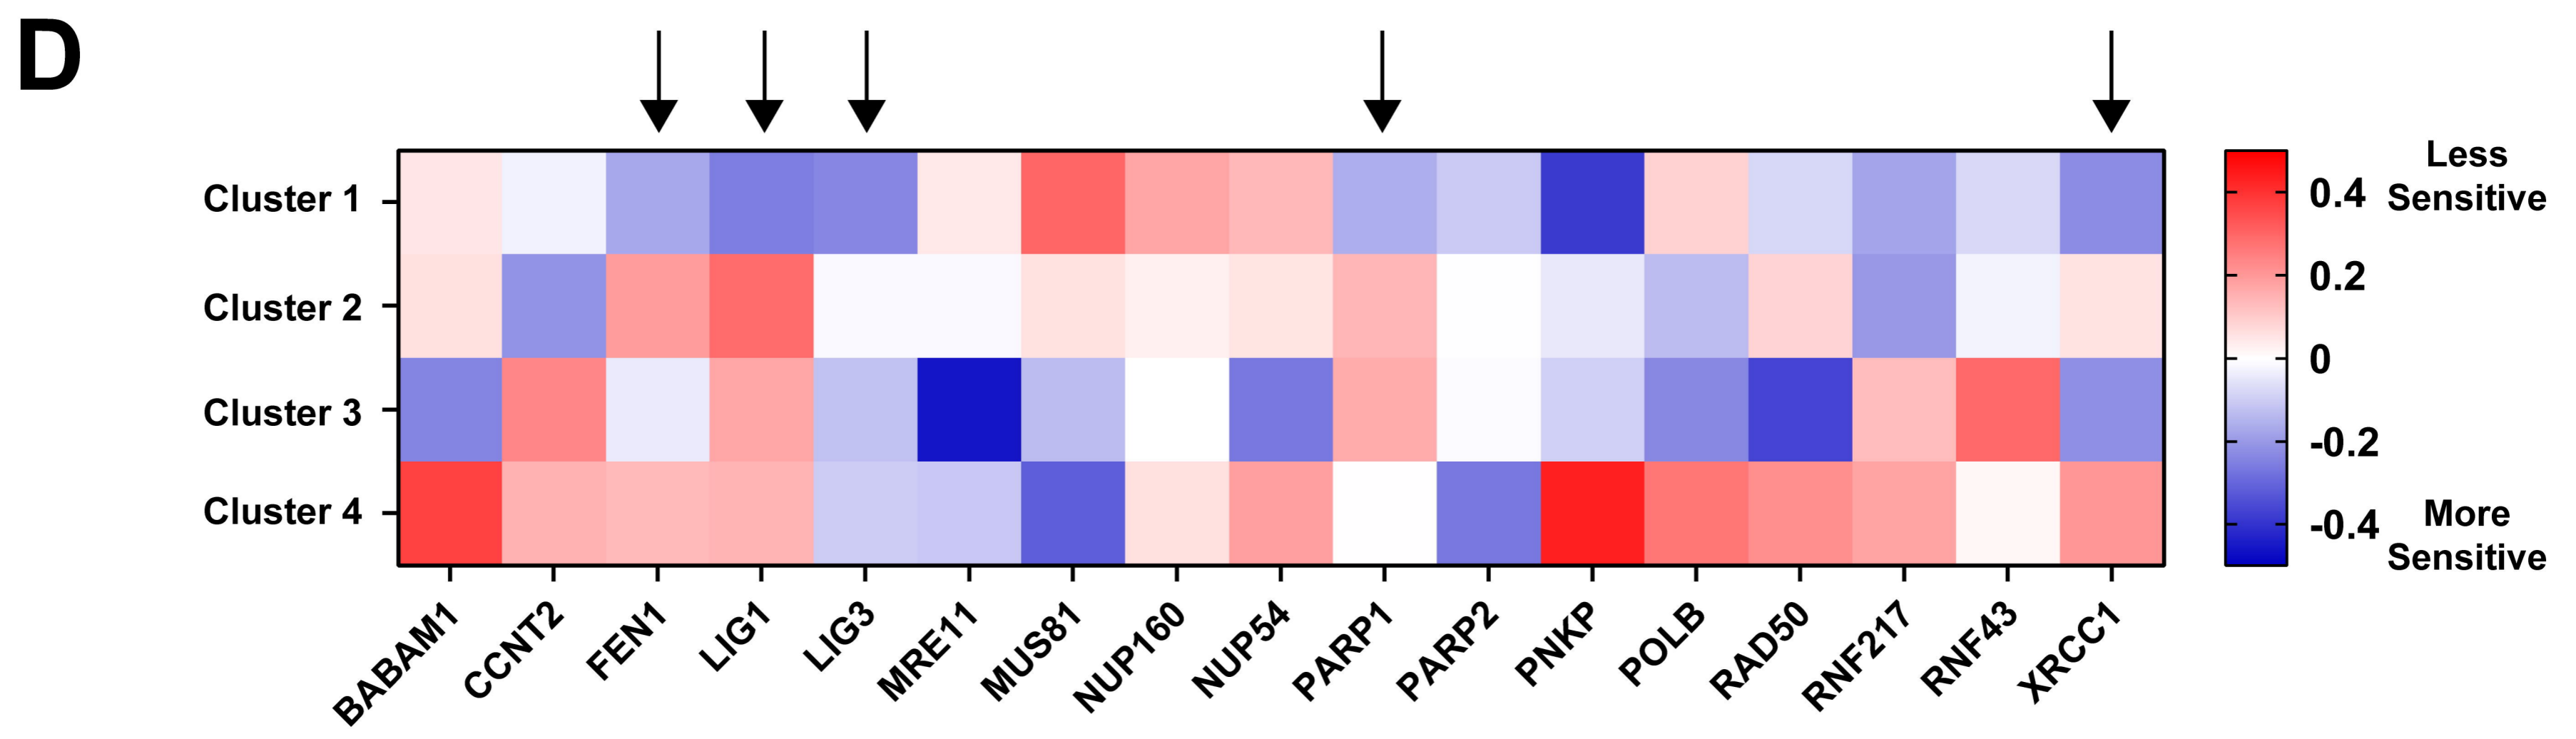

Source: https://www.biorxiv.org/content/10.1101/2020.10.18.333070v2.full.pdf
